# Supplementary material for: Diastereoselective synthesis of the C14–C29 fragment of amphidinol 3
Source: Royal Society of Chemistry journal article supplement (doi:10.1039/c3ob41569d), 2013-01-01

## Supporting Information

Diastereoselective Synthesis of the C14-C29 Fragment of Amphidinol 3.

*Nicolas Rival,<sup>a</sup> Gilles Hanquet,<sup>a\*</sup> Charlelie Bensoussan,<sup>b</sup> Sébastien Reymond,<sup>b</sup> Janine Cossy,<sup>b</sup>  
Françoise Colobert<sup>a\*</sup>*

<sup>a</sup>Laboratoire de Stéréochimie, CNRS/Université de Strasbourg (ECPM)

25 Rue Becquerel, 67087-Strasbourg Cedex 02, France

<sup>b</sup>Laboratoire de Chimie Organique, ESPCI *ParisTech*, CNRS

10 rue Vauquelin, 75231-Paris Cedex 05, France

[francoise.colobert@unistra.fr](mailto:francoise.colobert@unistra.fr); [ghanquet@unistra.fr](mailto:ghanquet@unistra.fr)

## Table of contents

<sup>1</sup>H and <sup>13</sup>C NMR Spectra for **7-11**, **15**, **22-30** and intermediate compounds

S-1

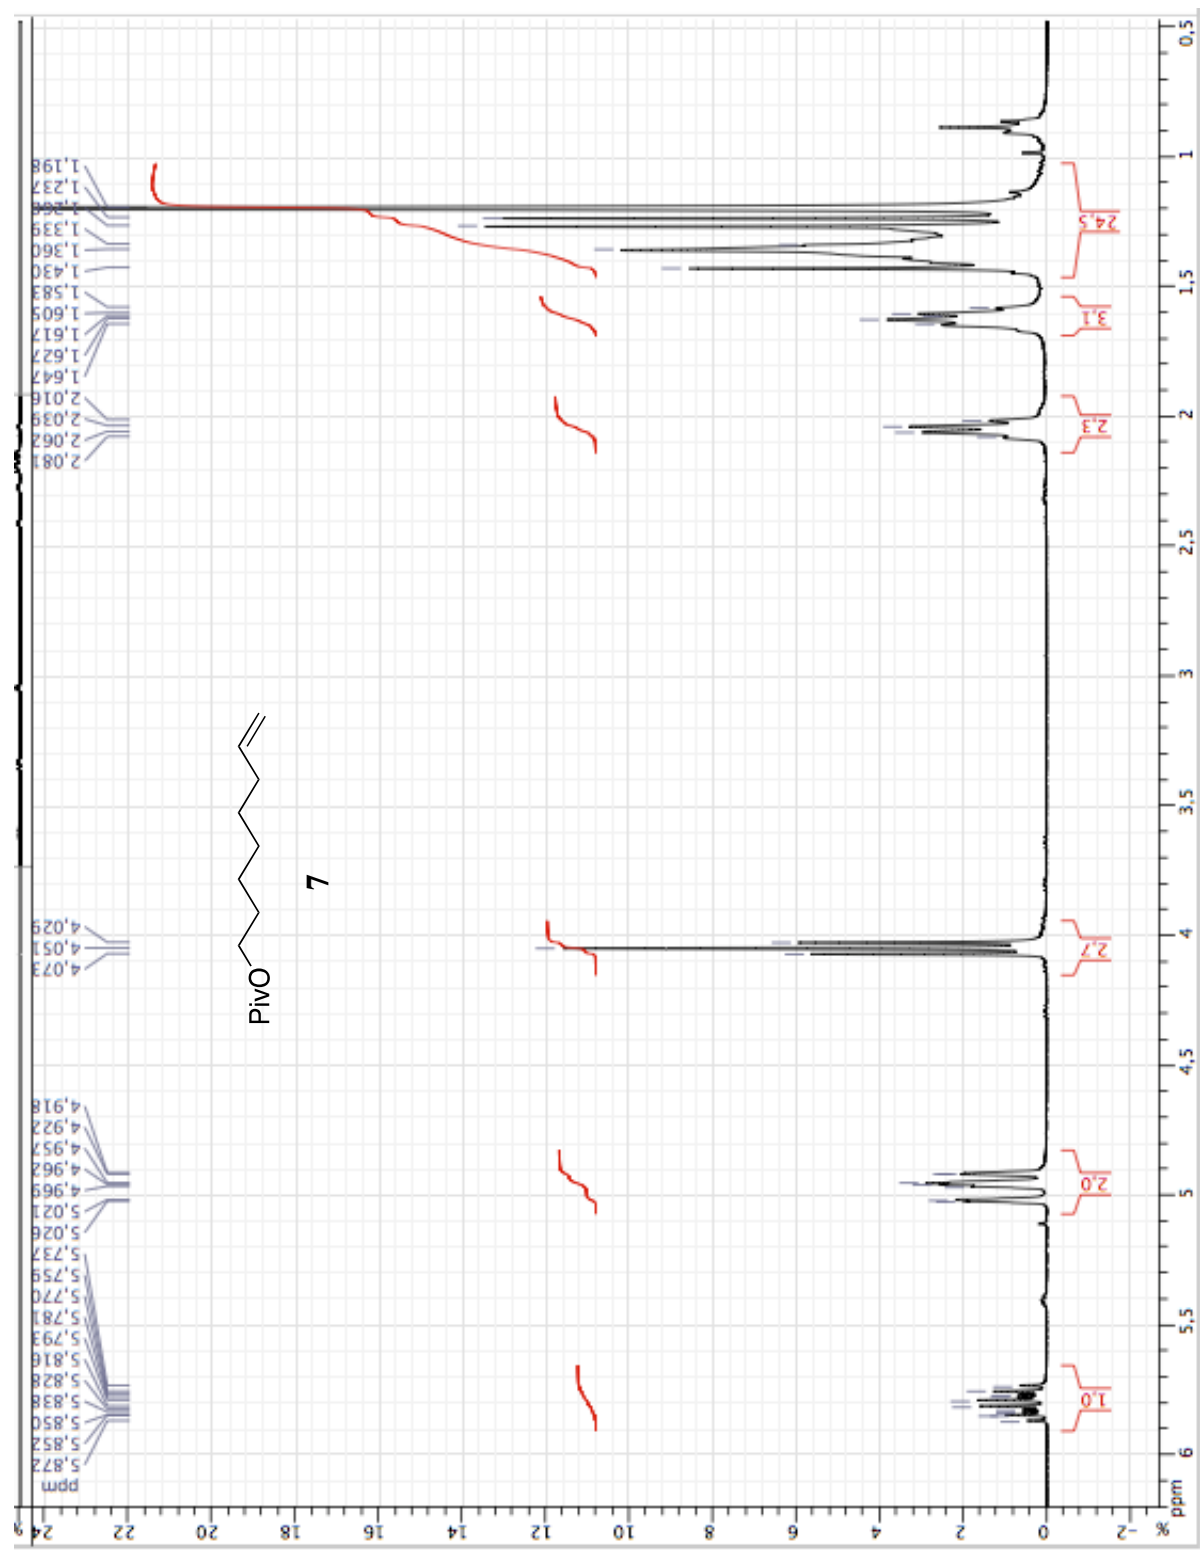

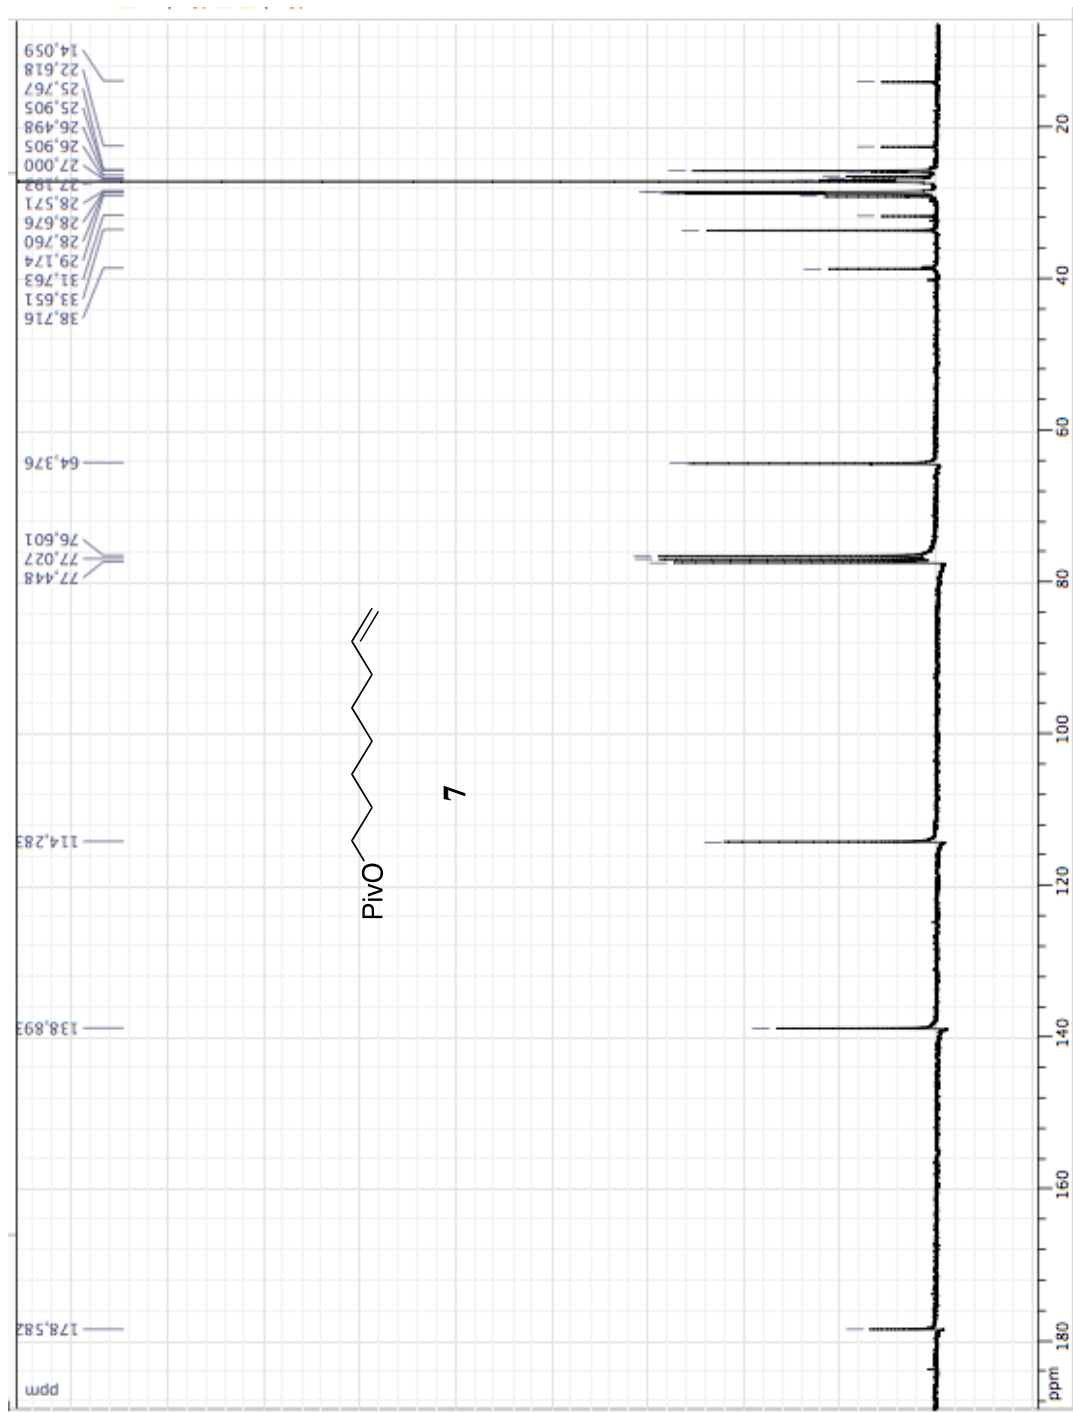

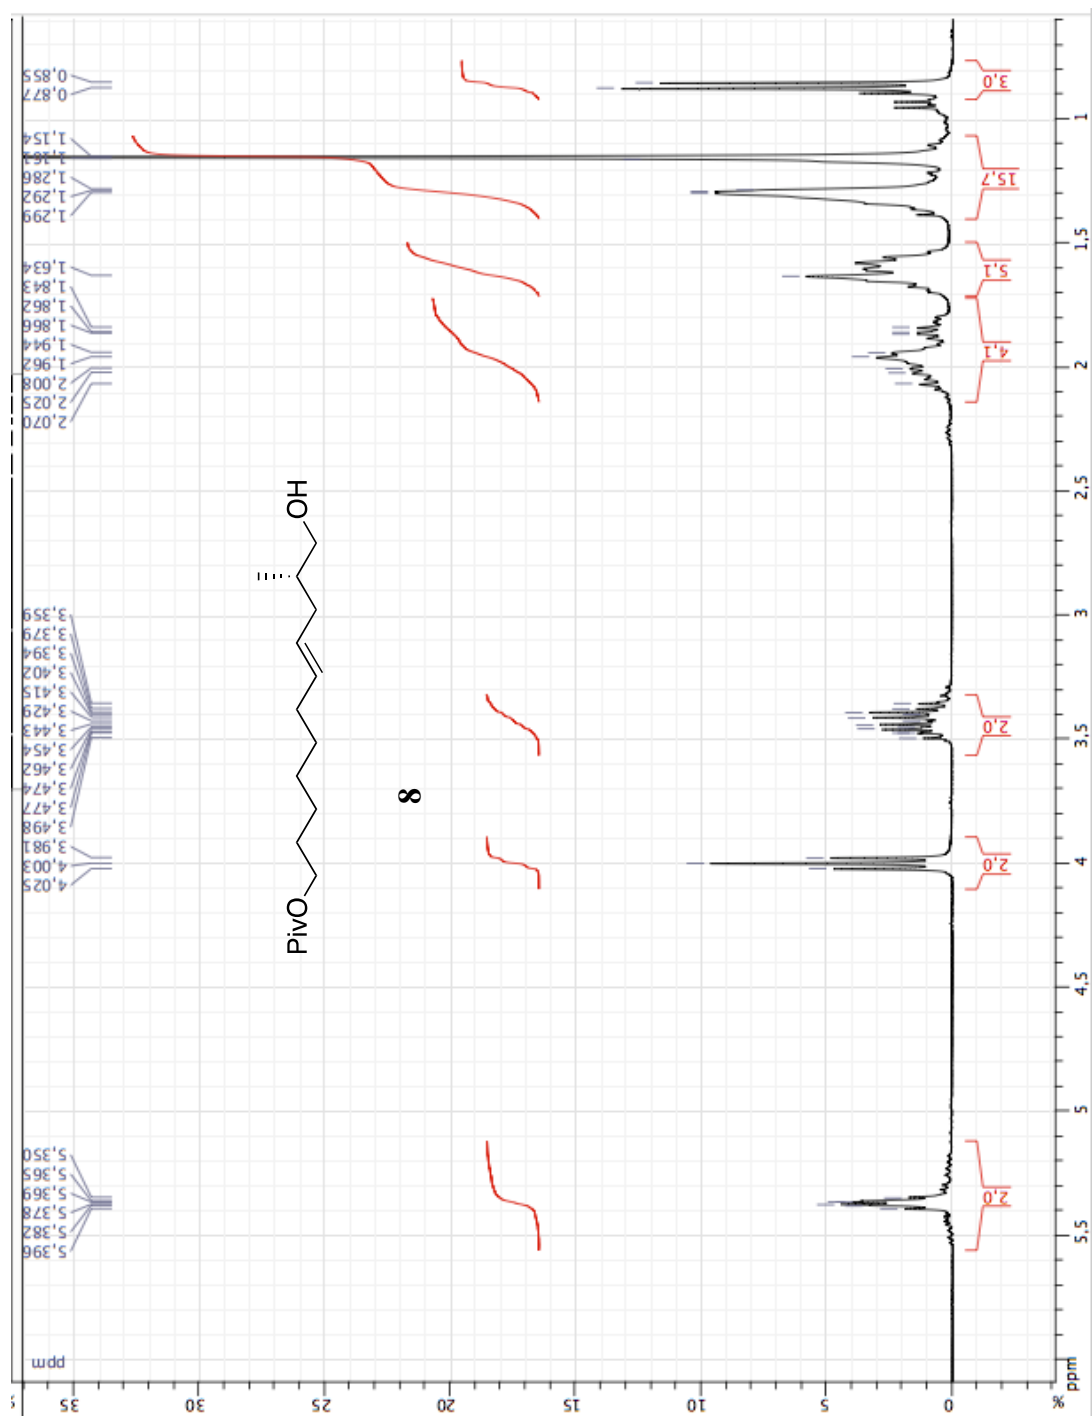

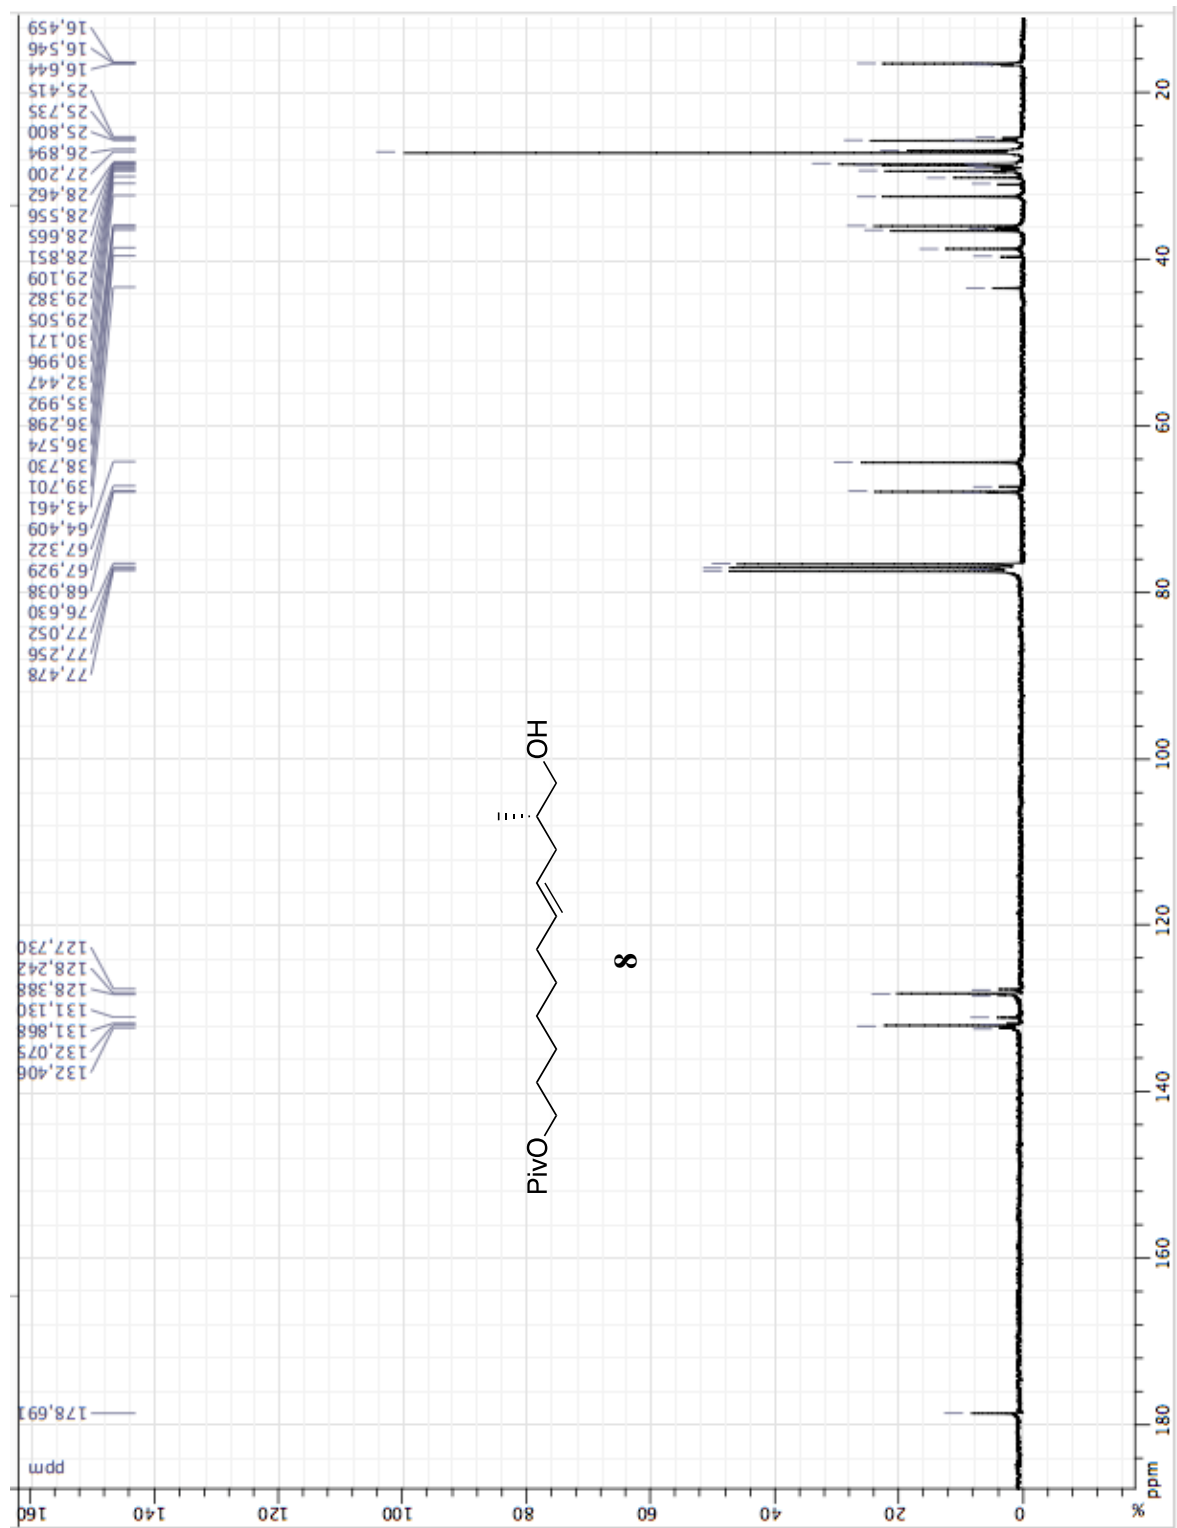

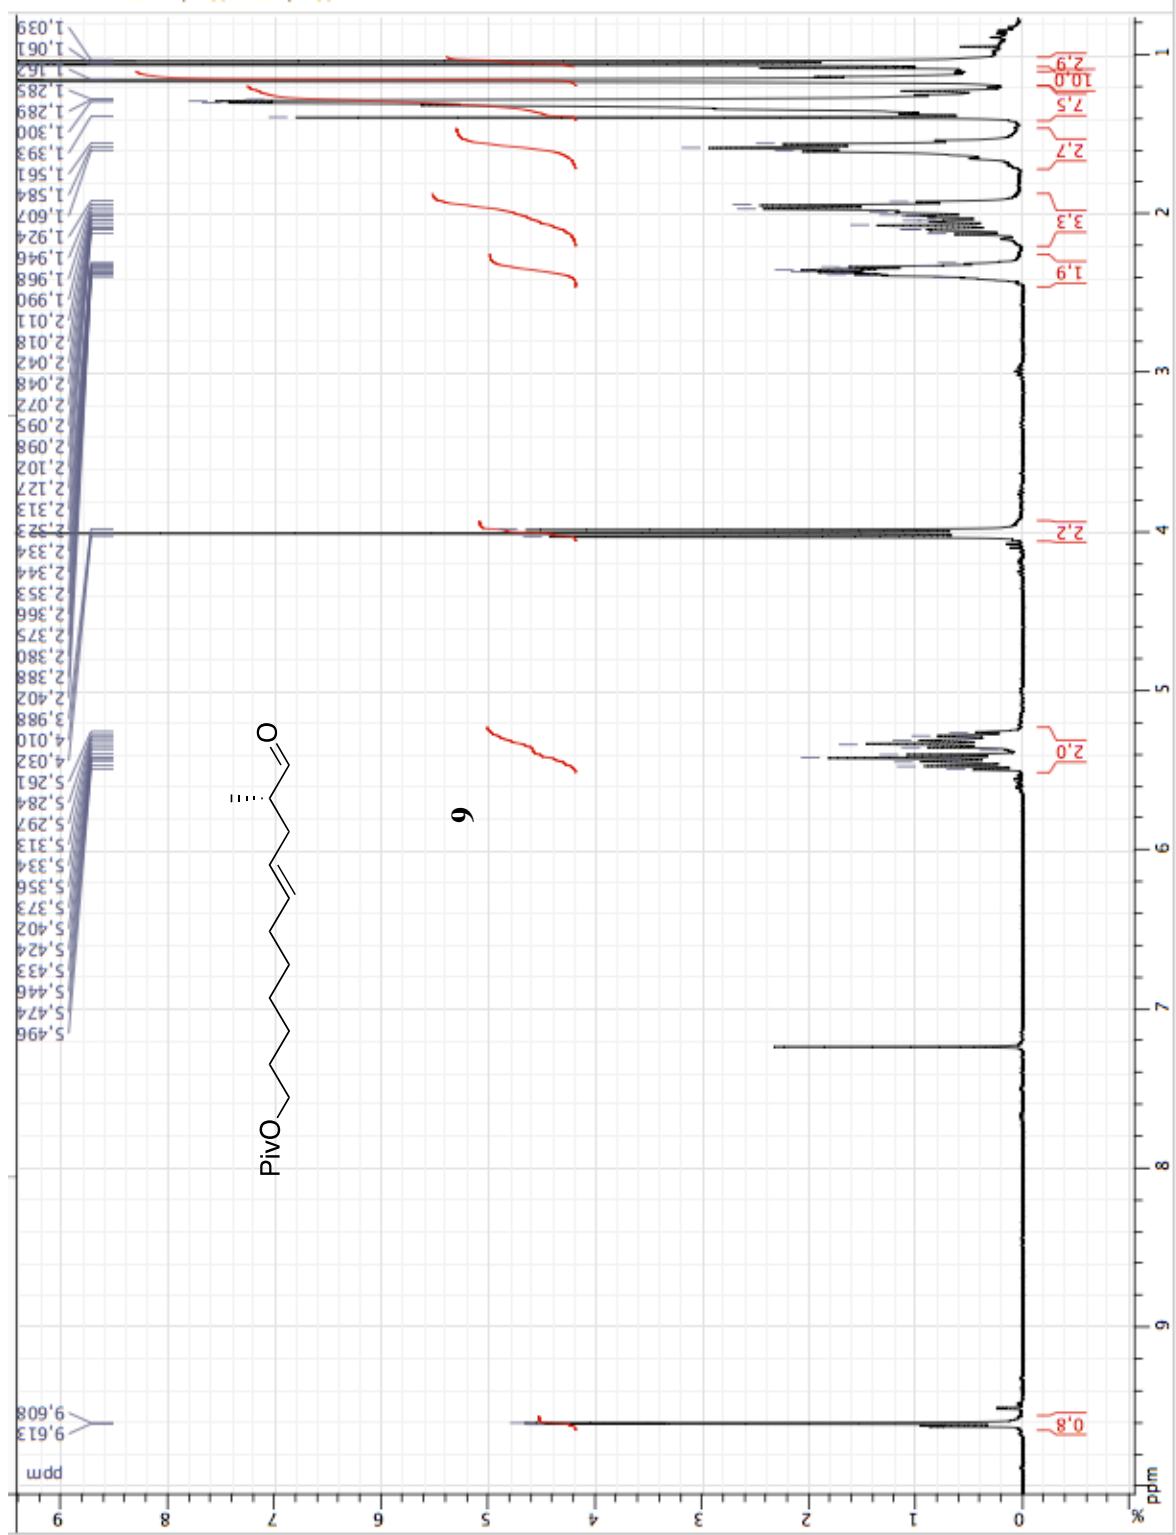

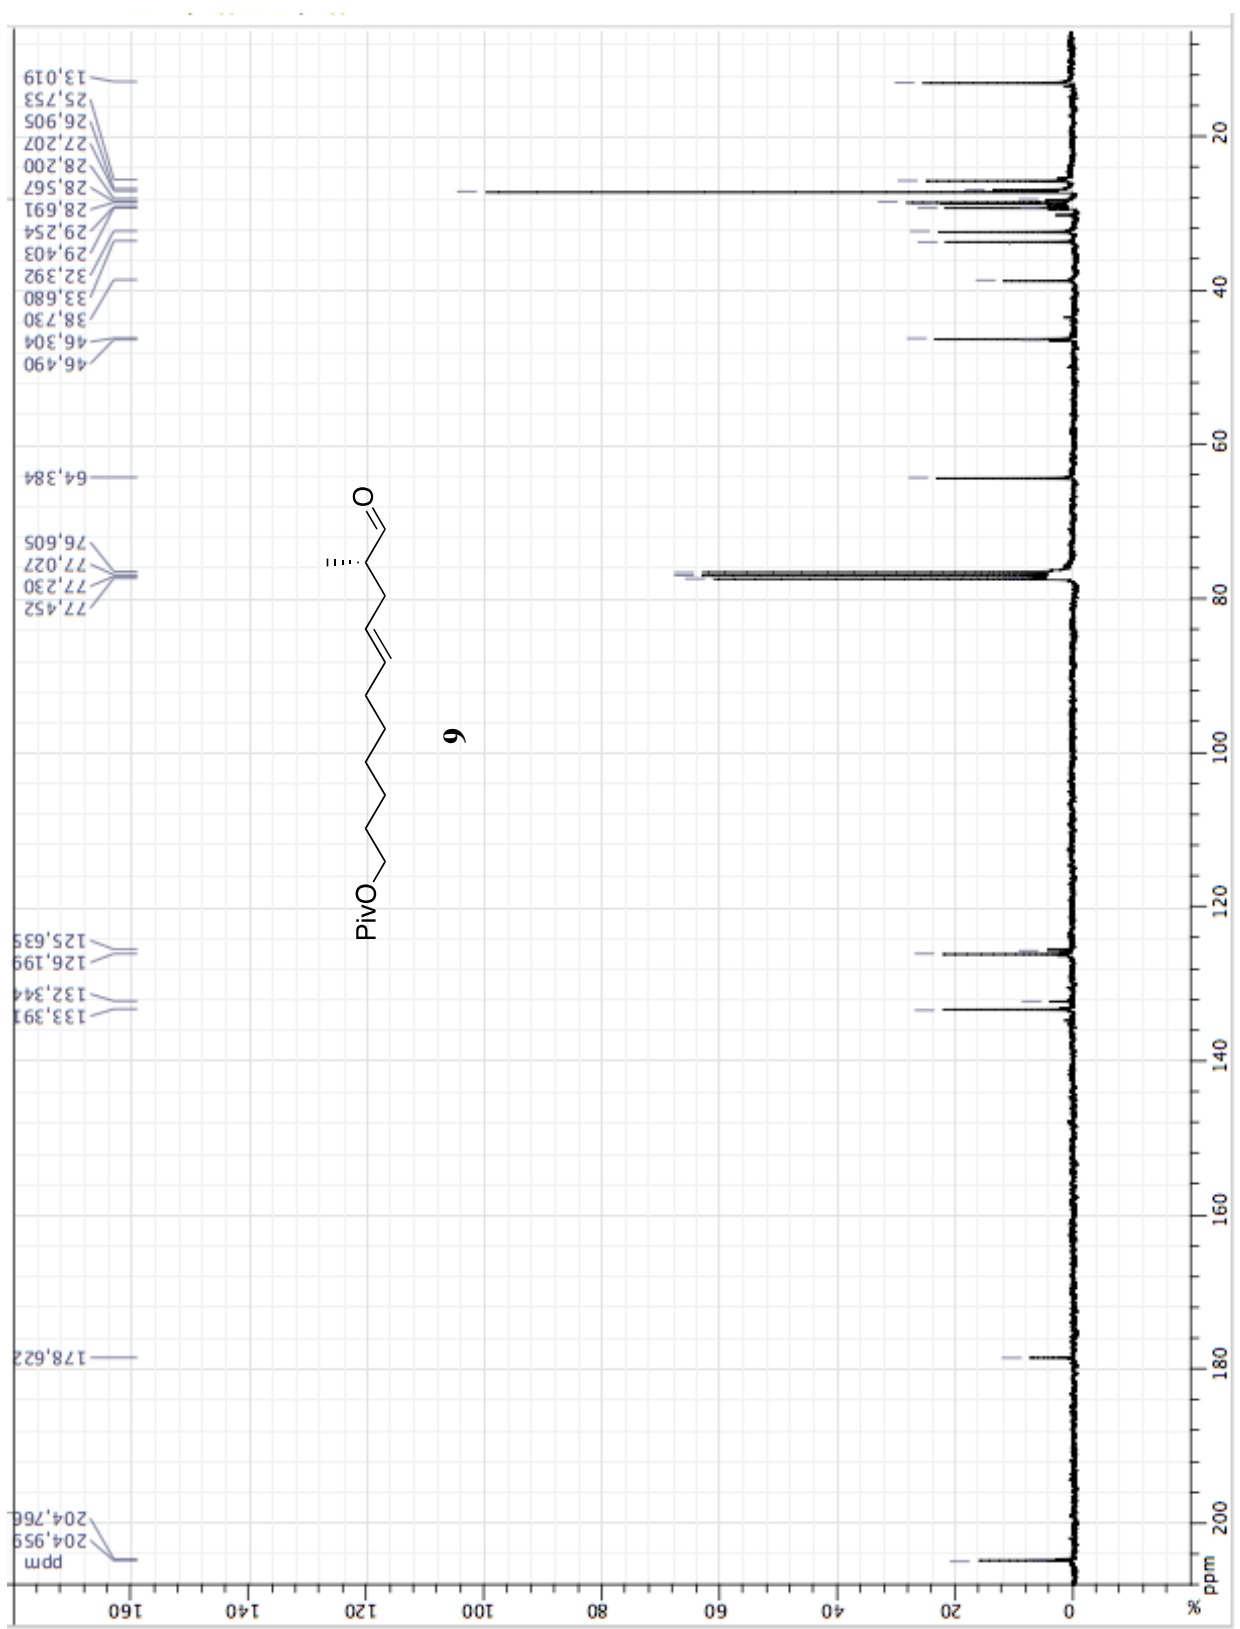

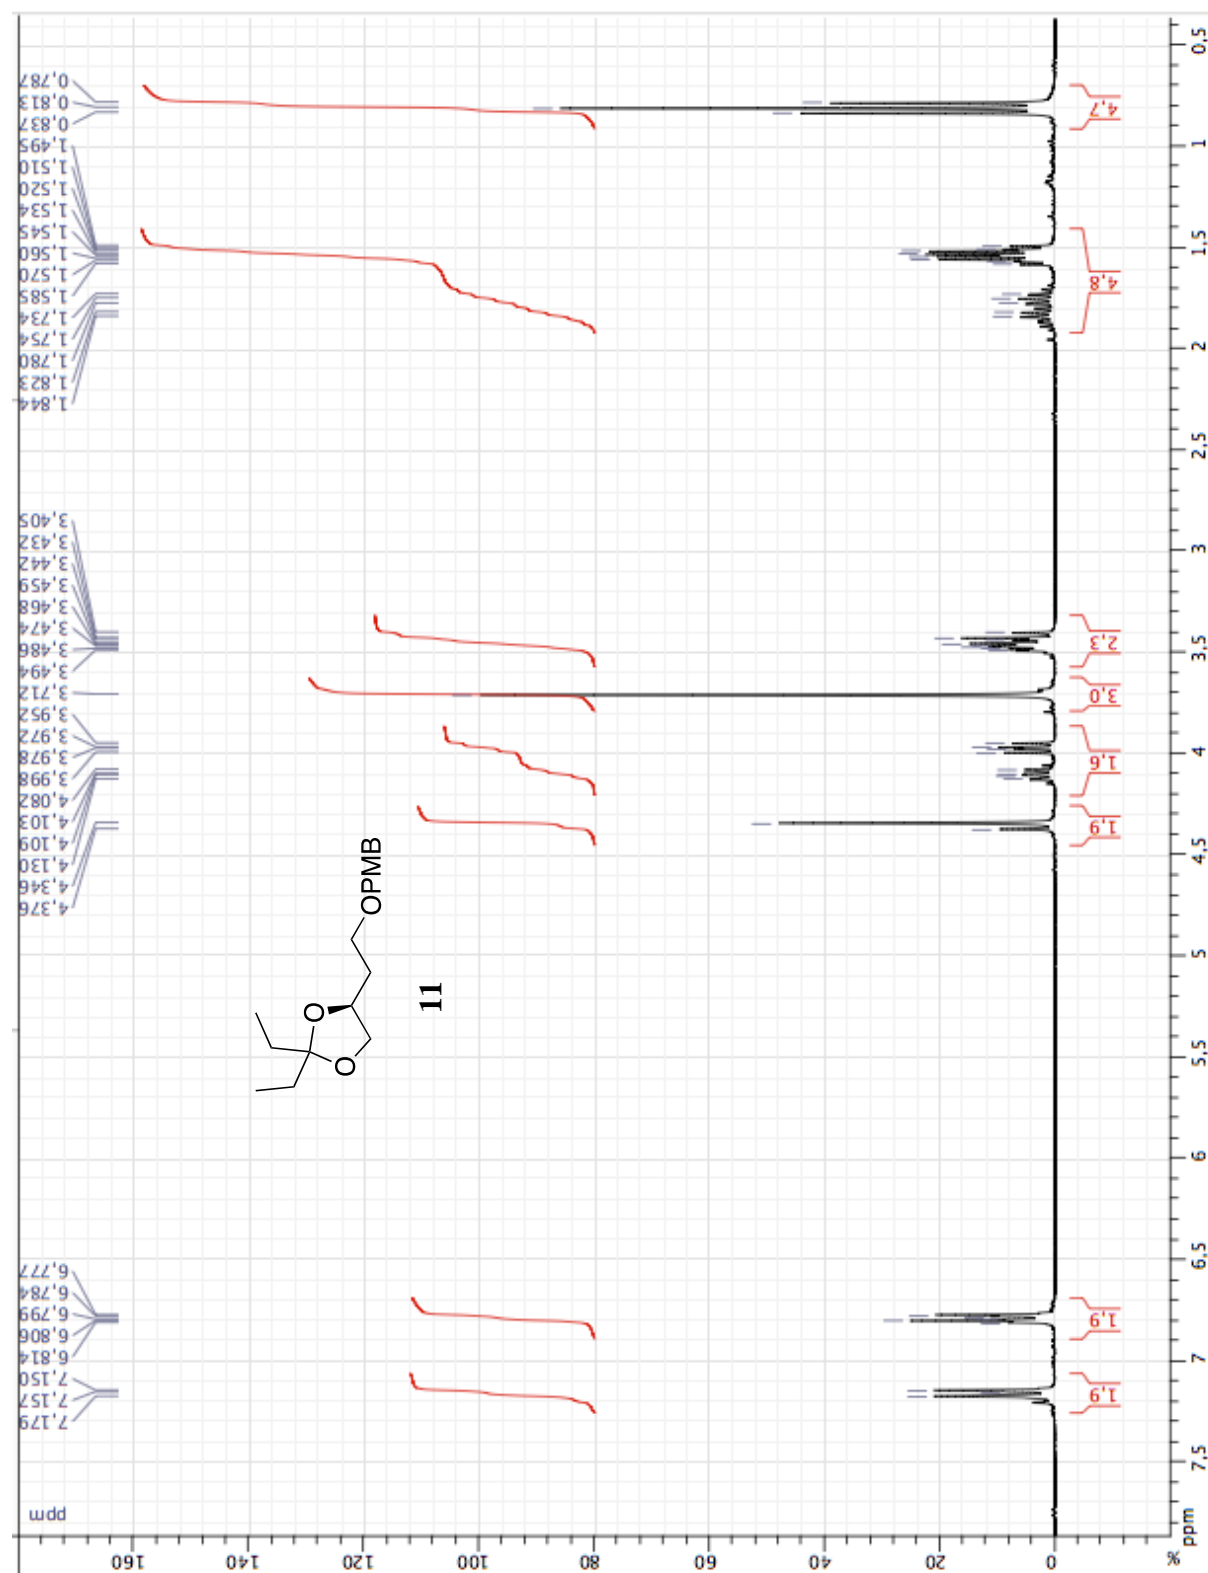

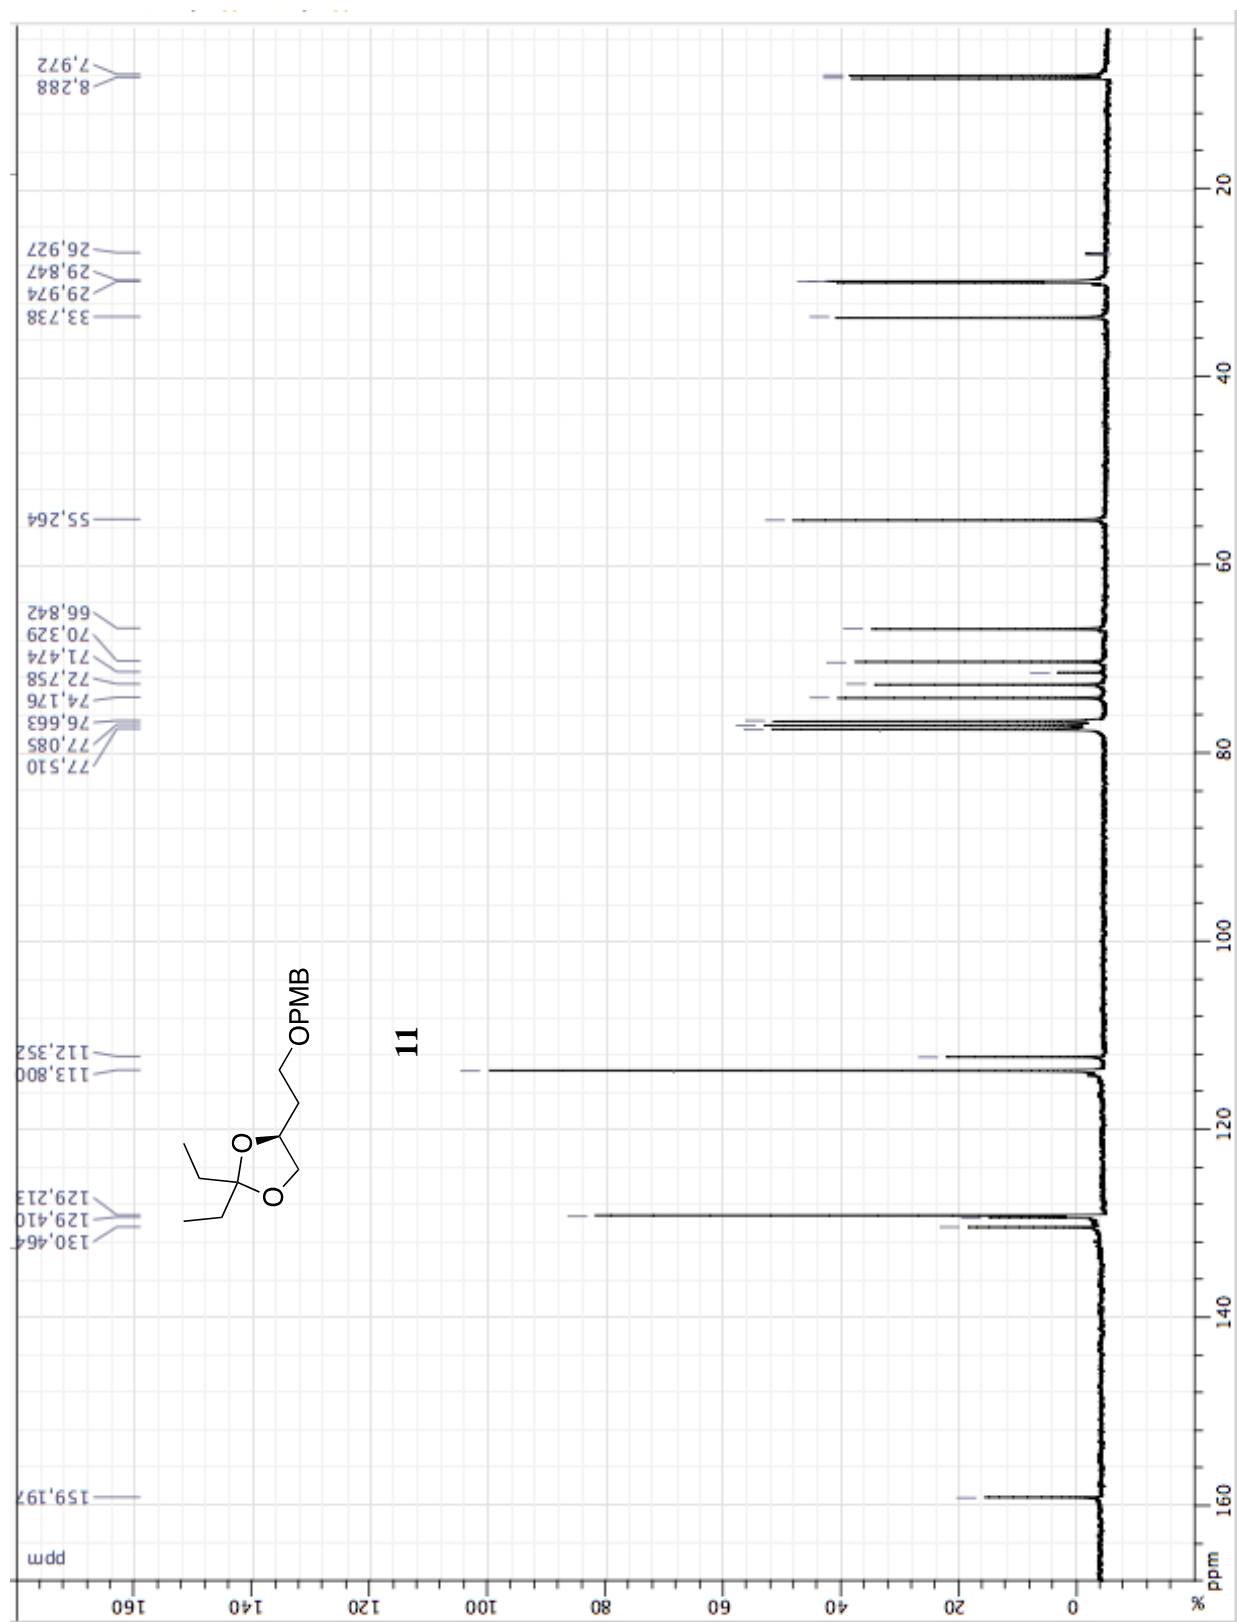

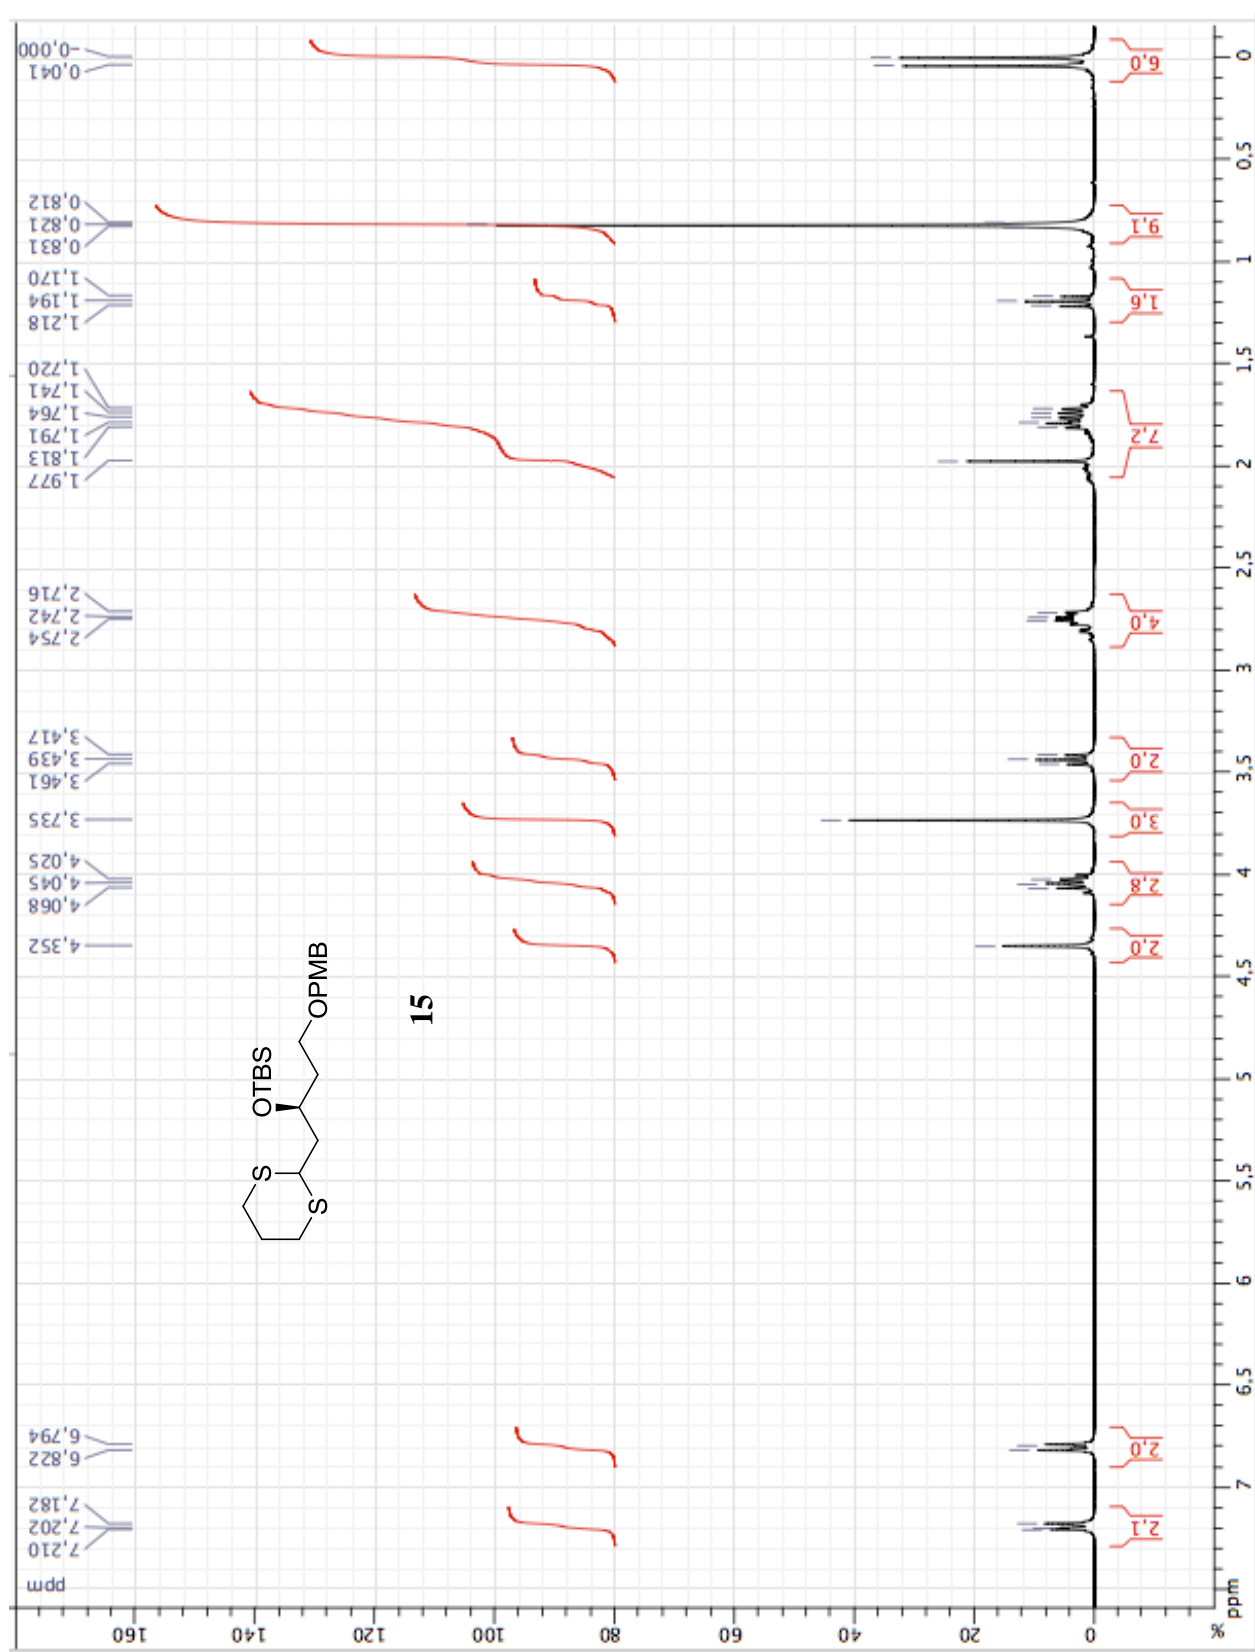

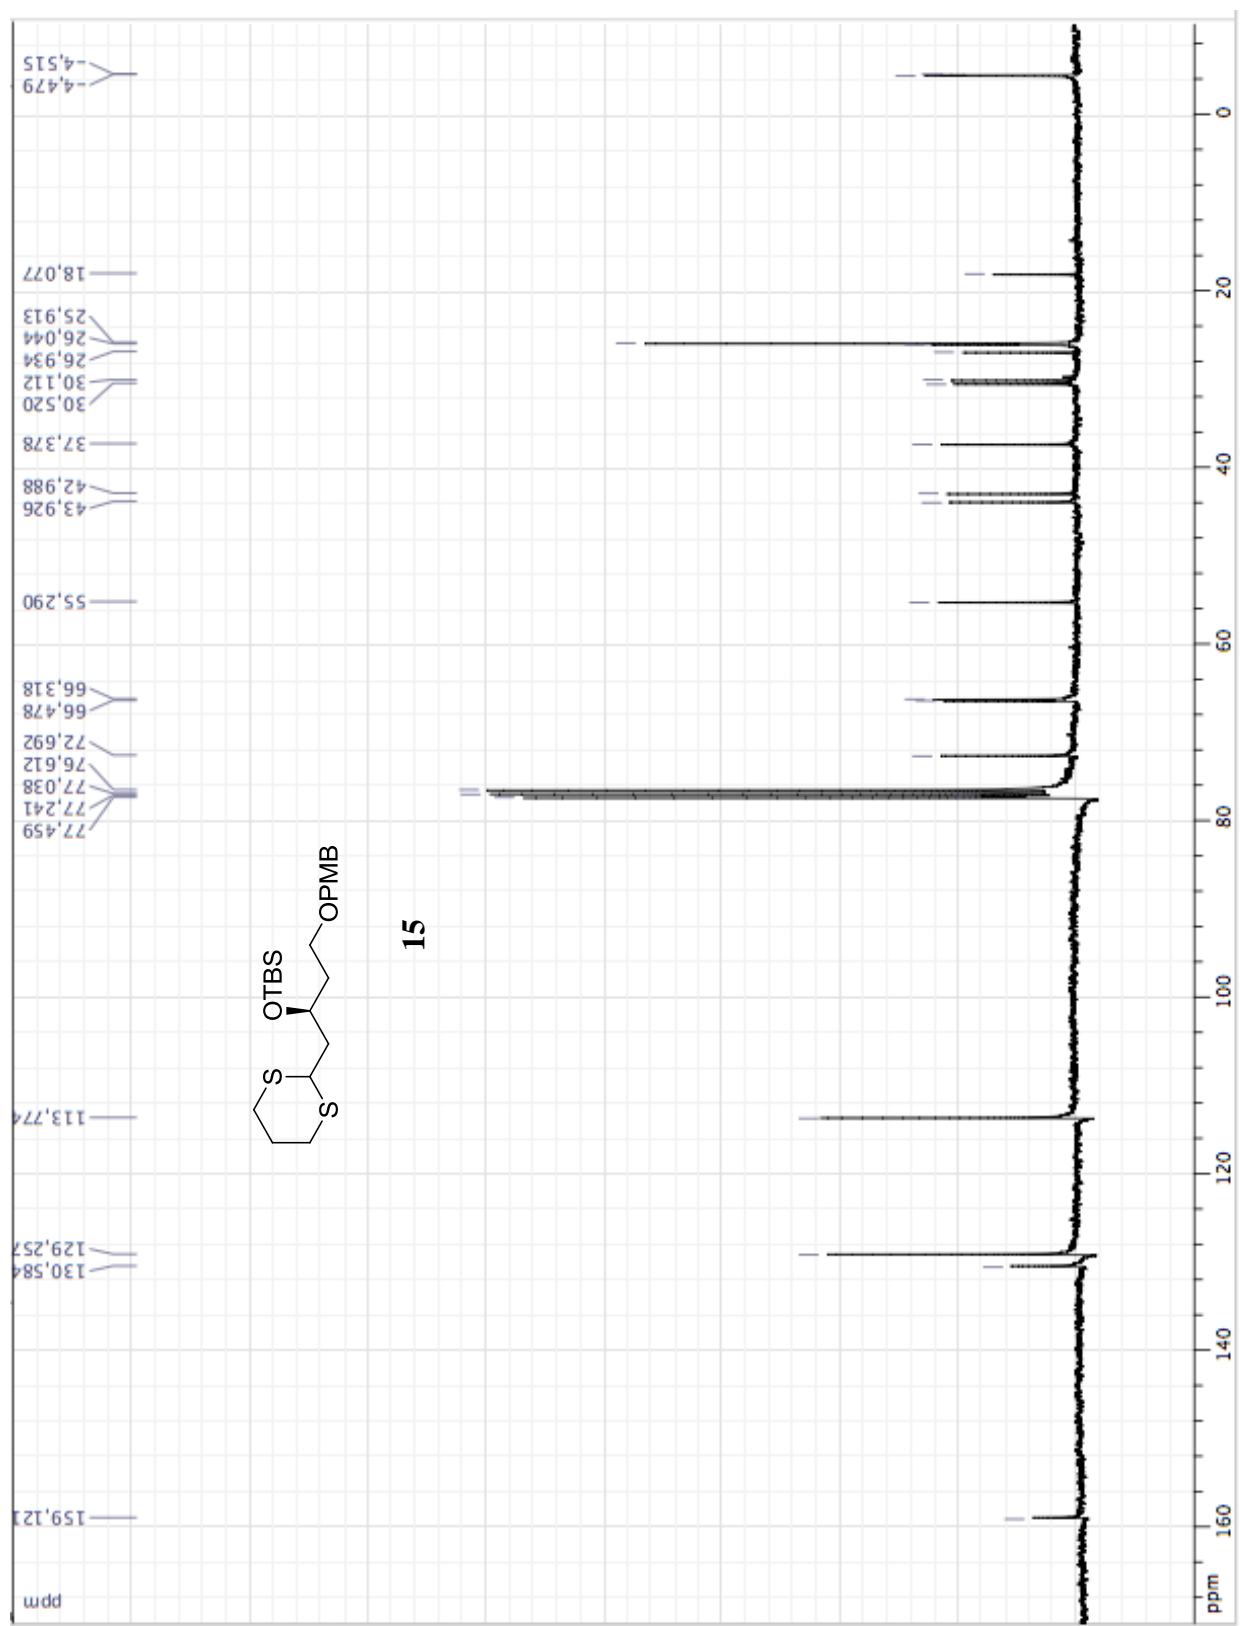

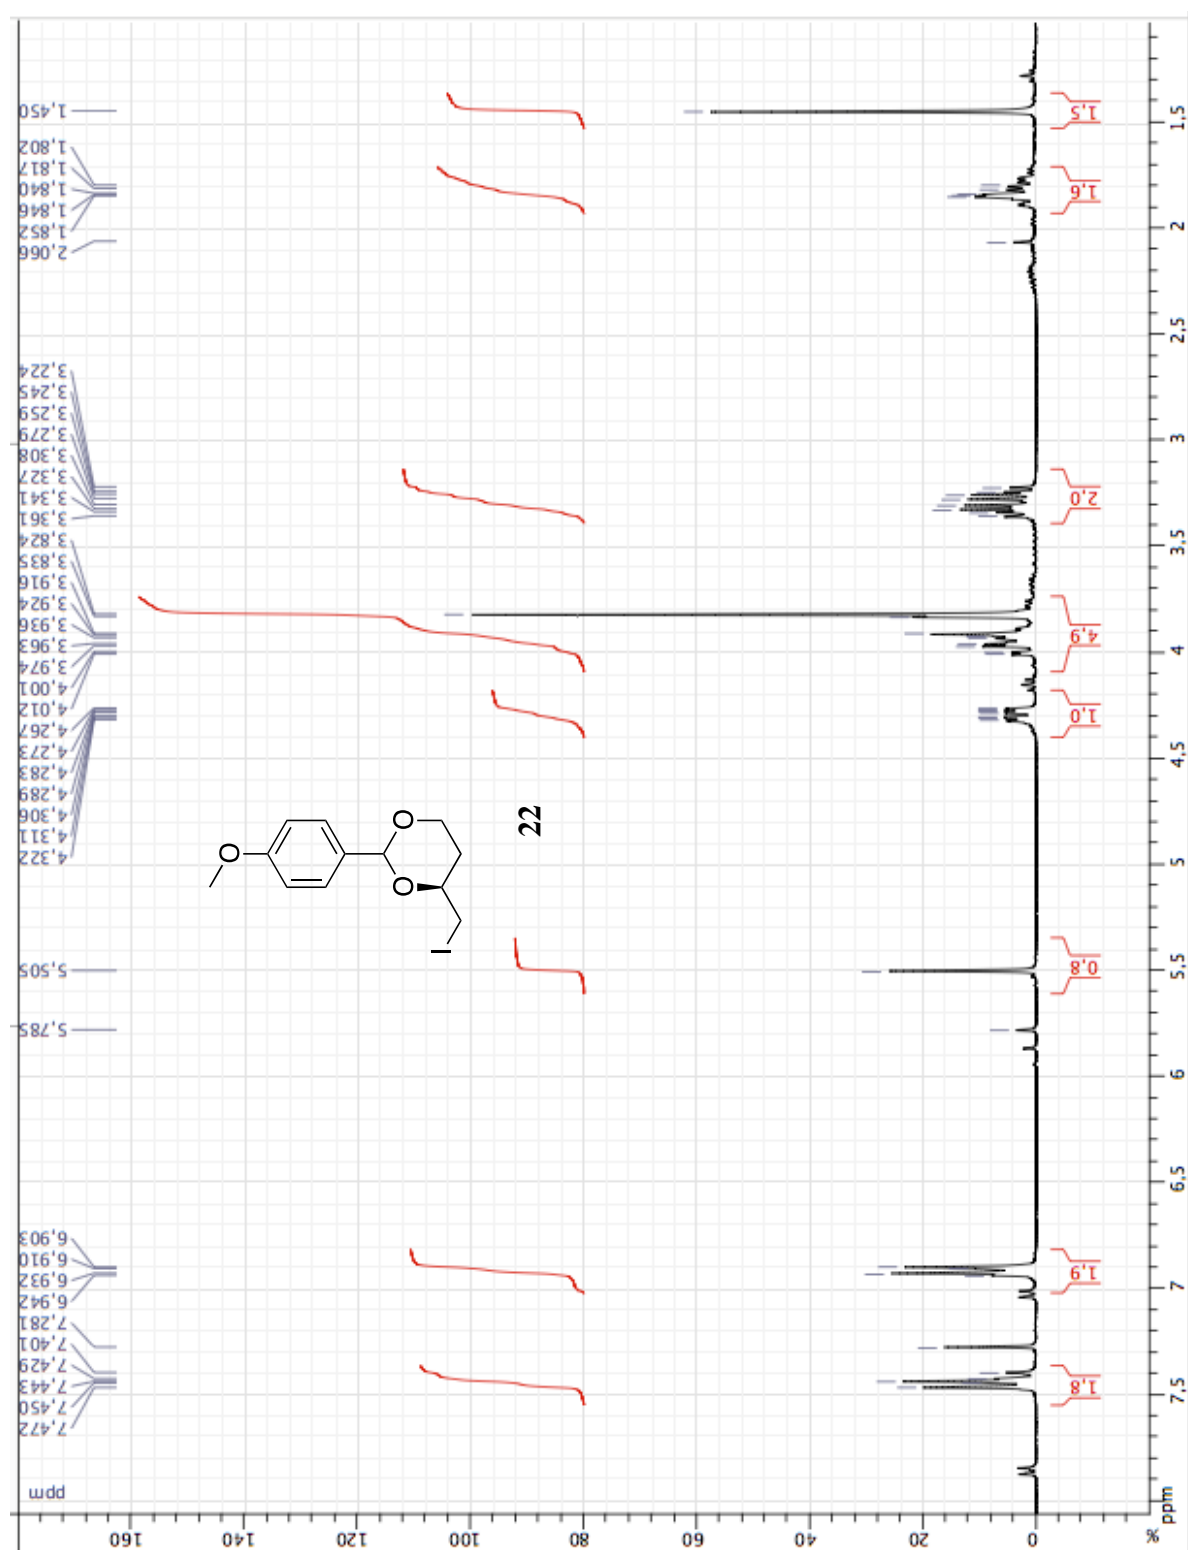

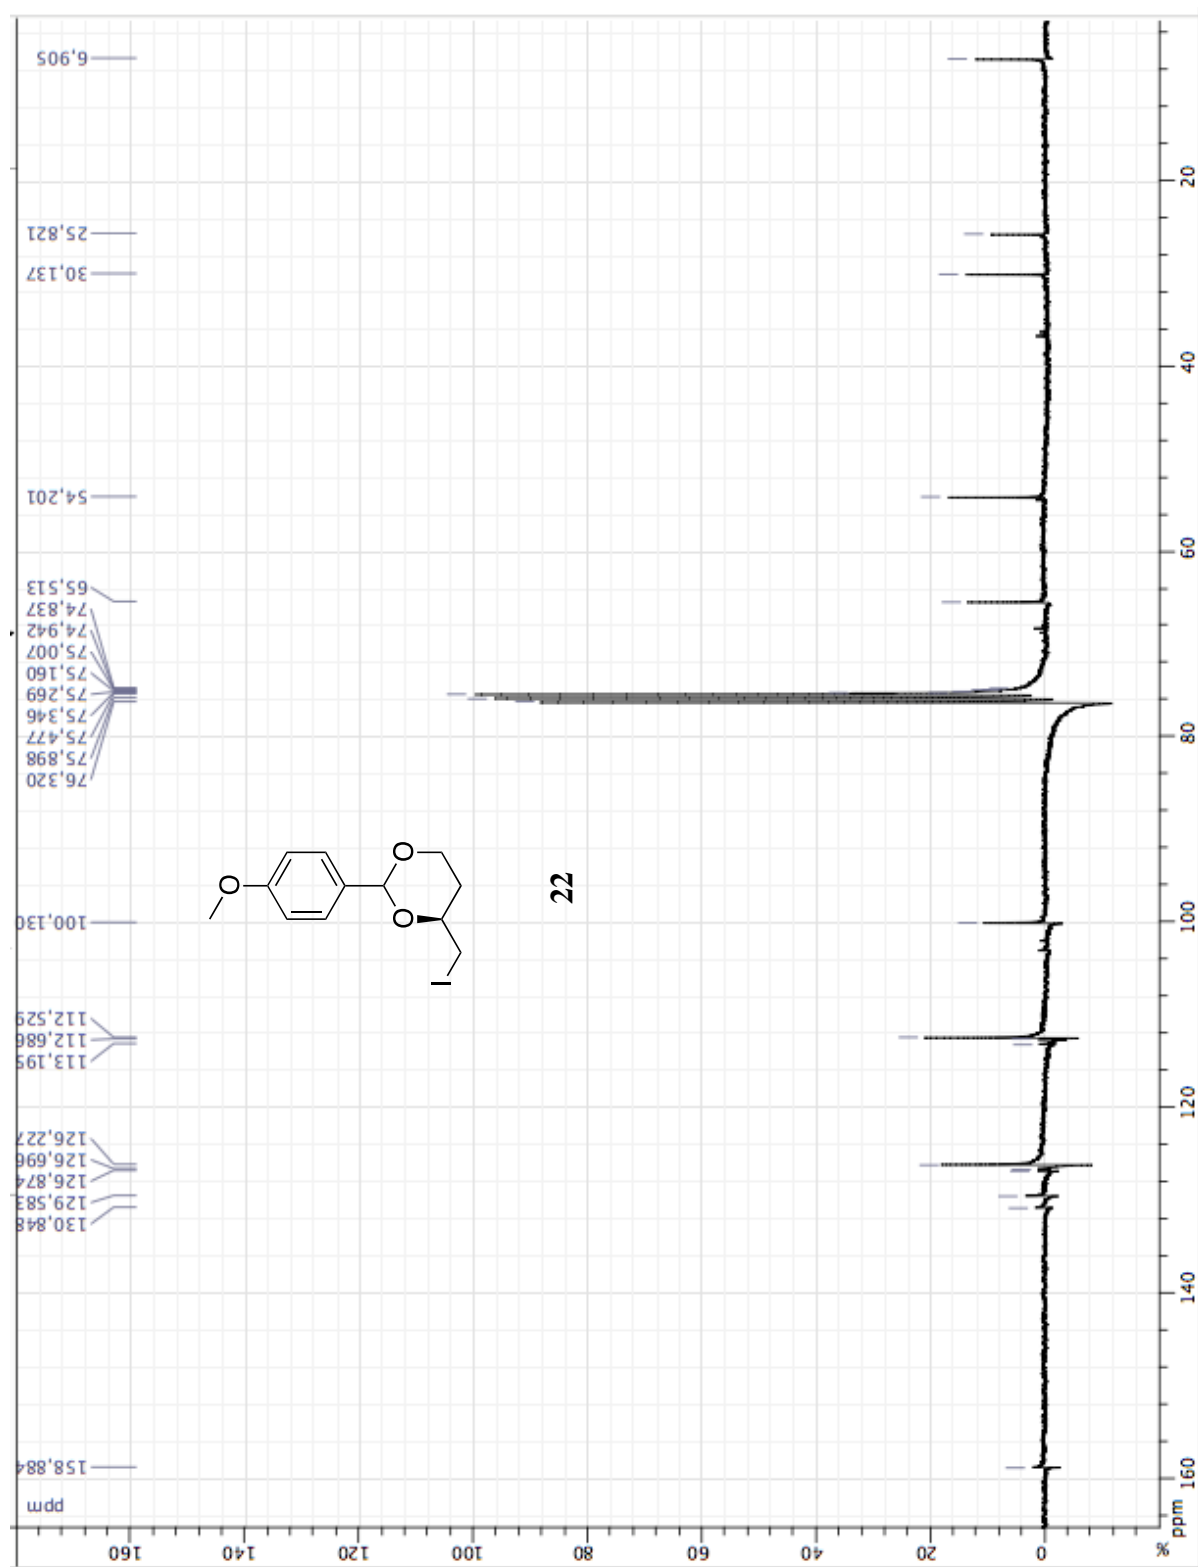

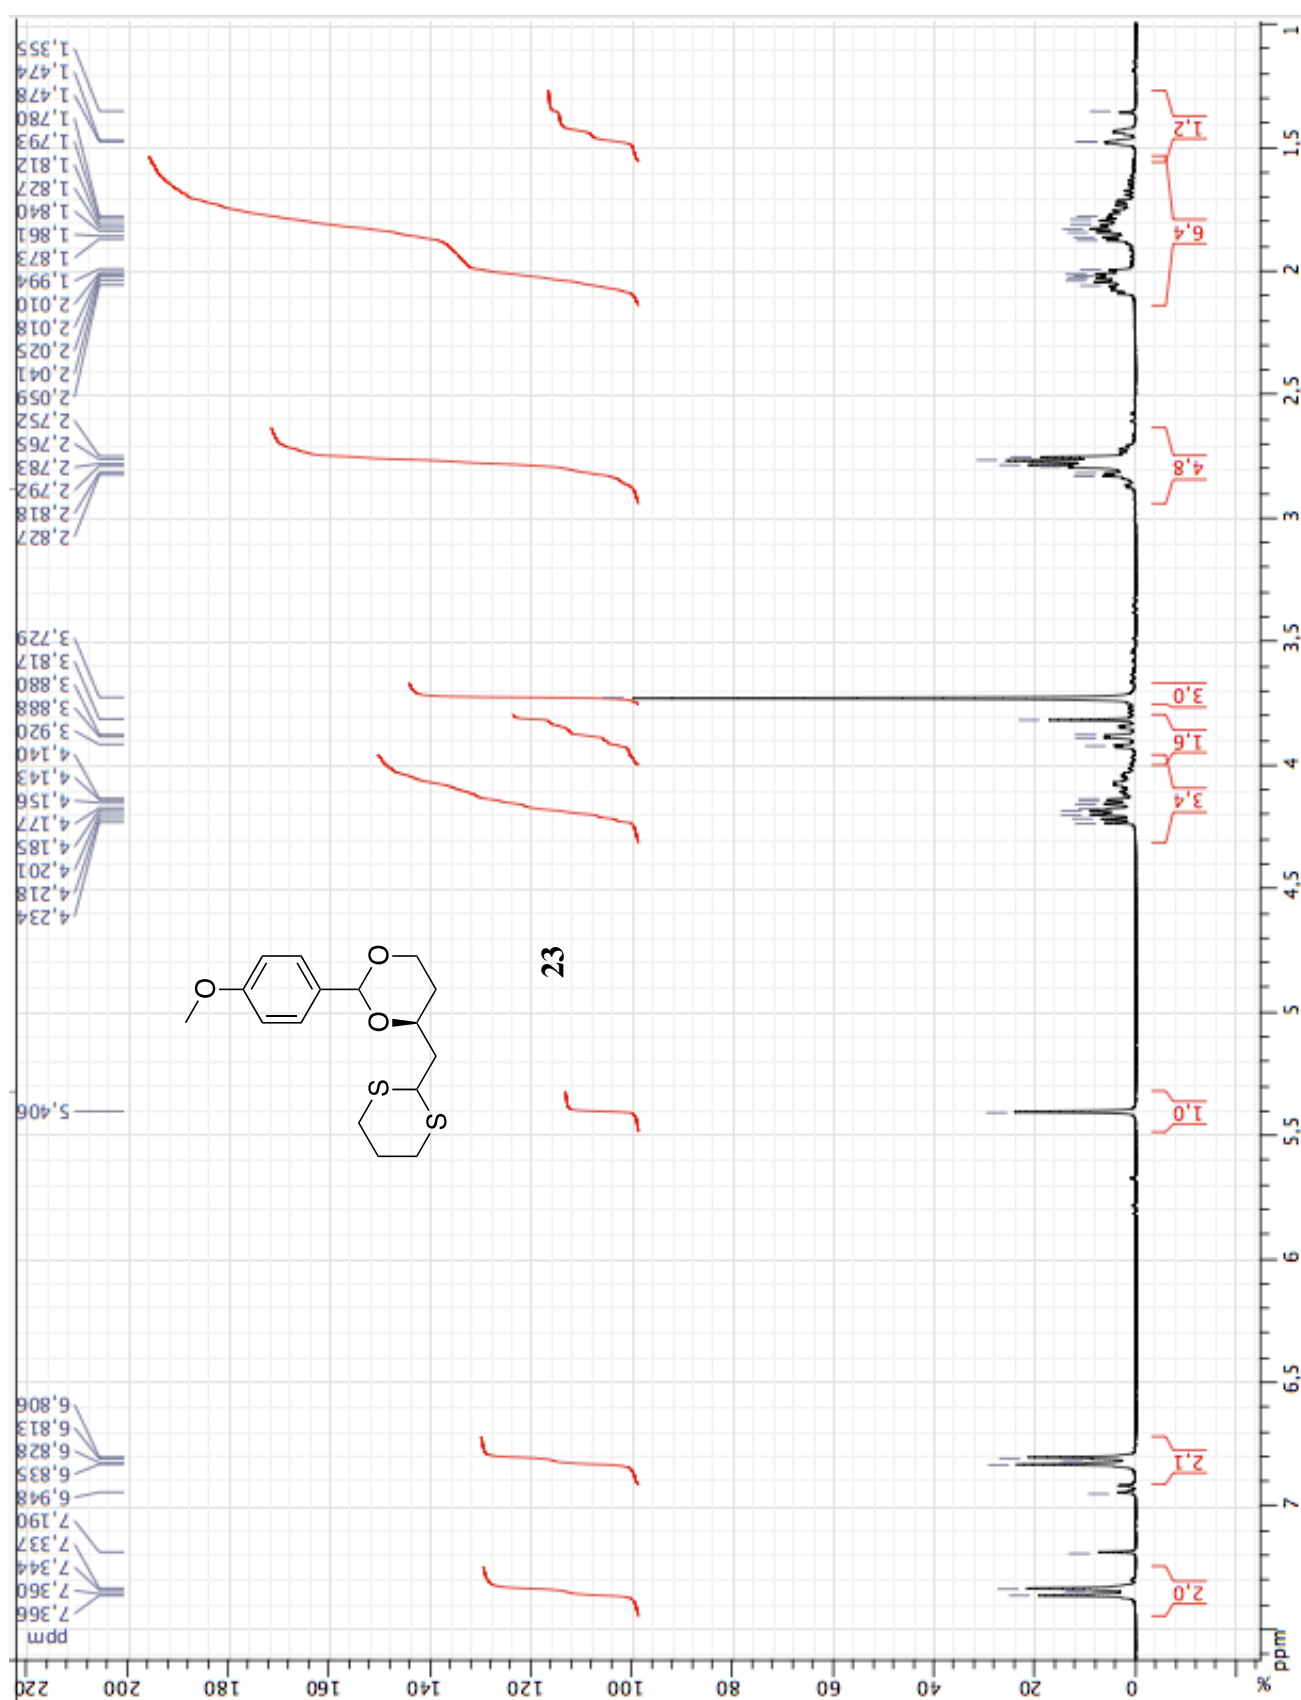

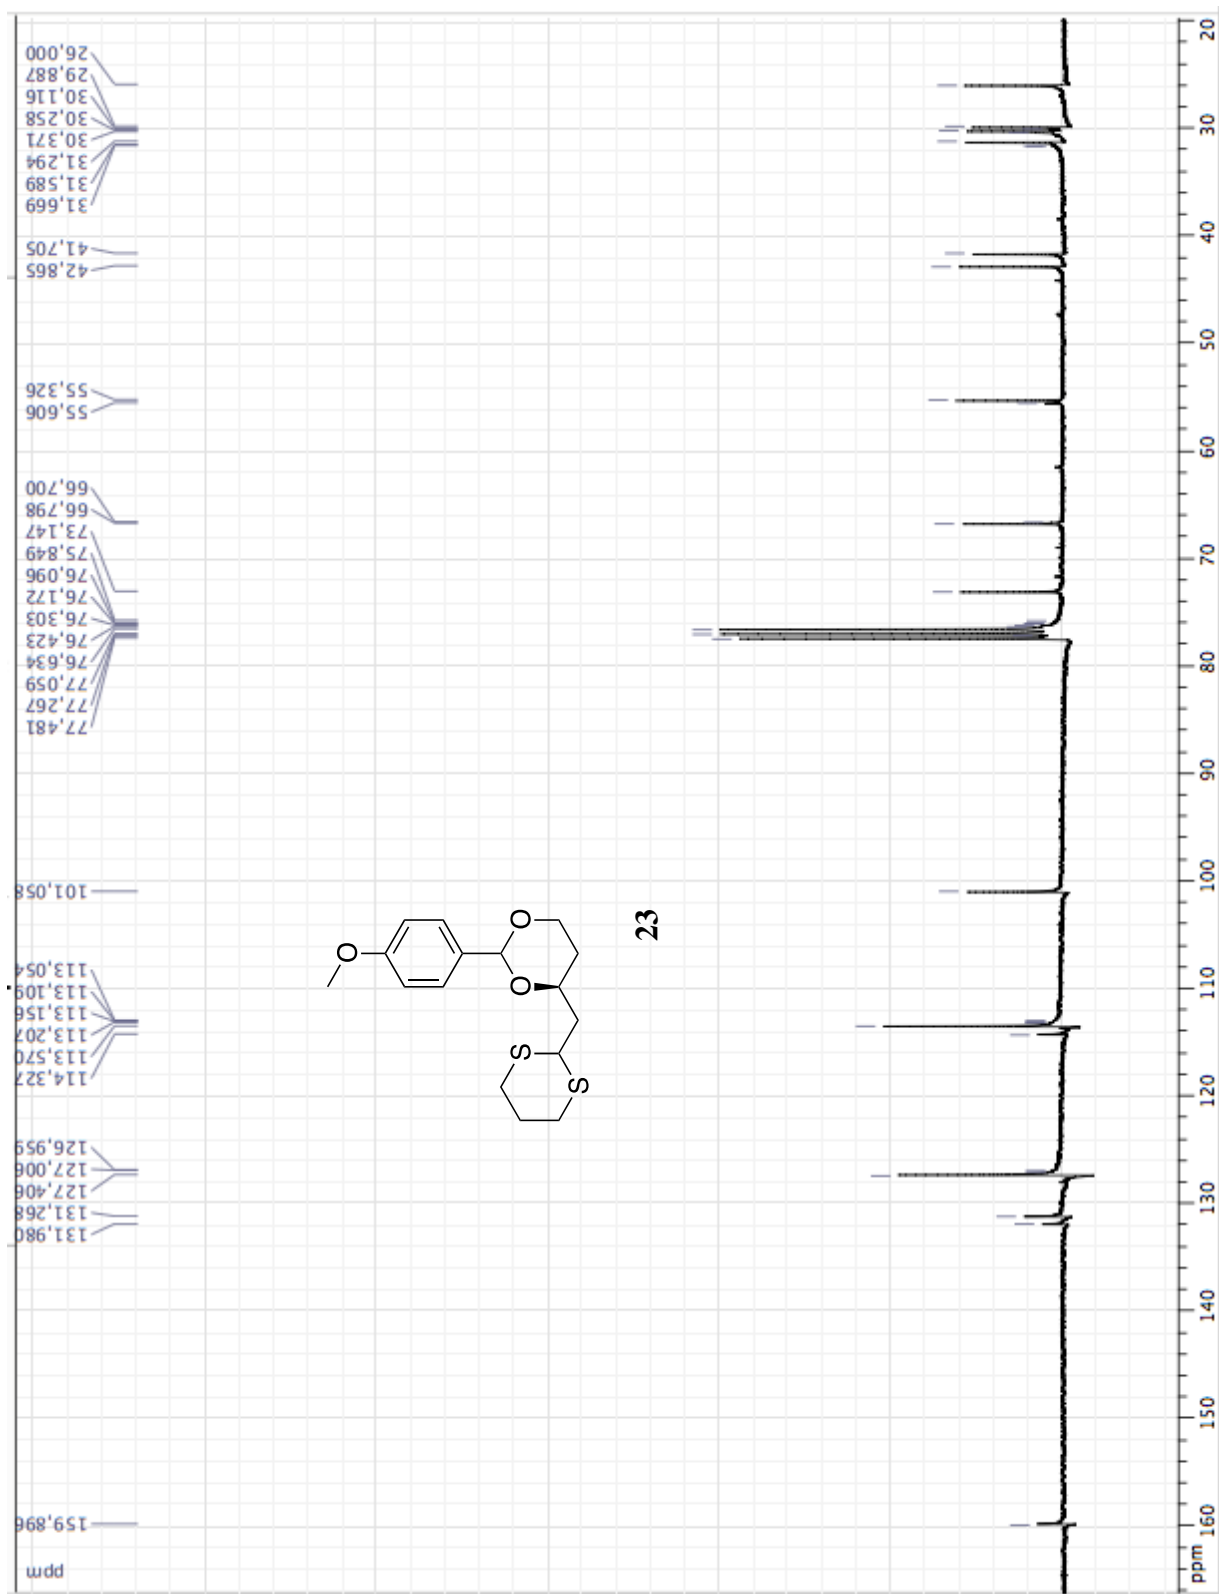

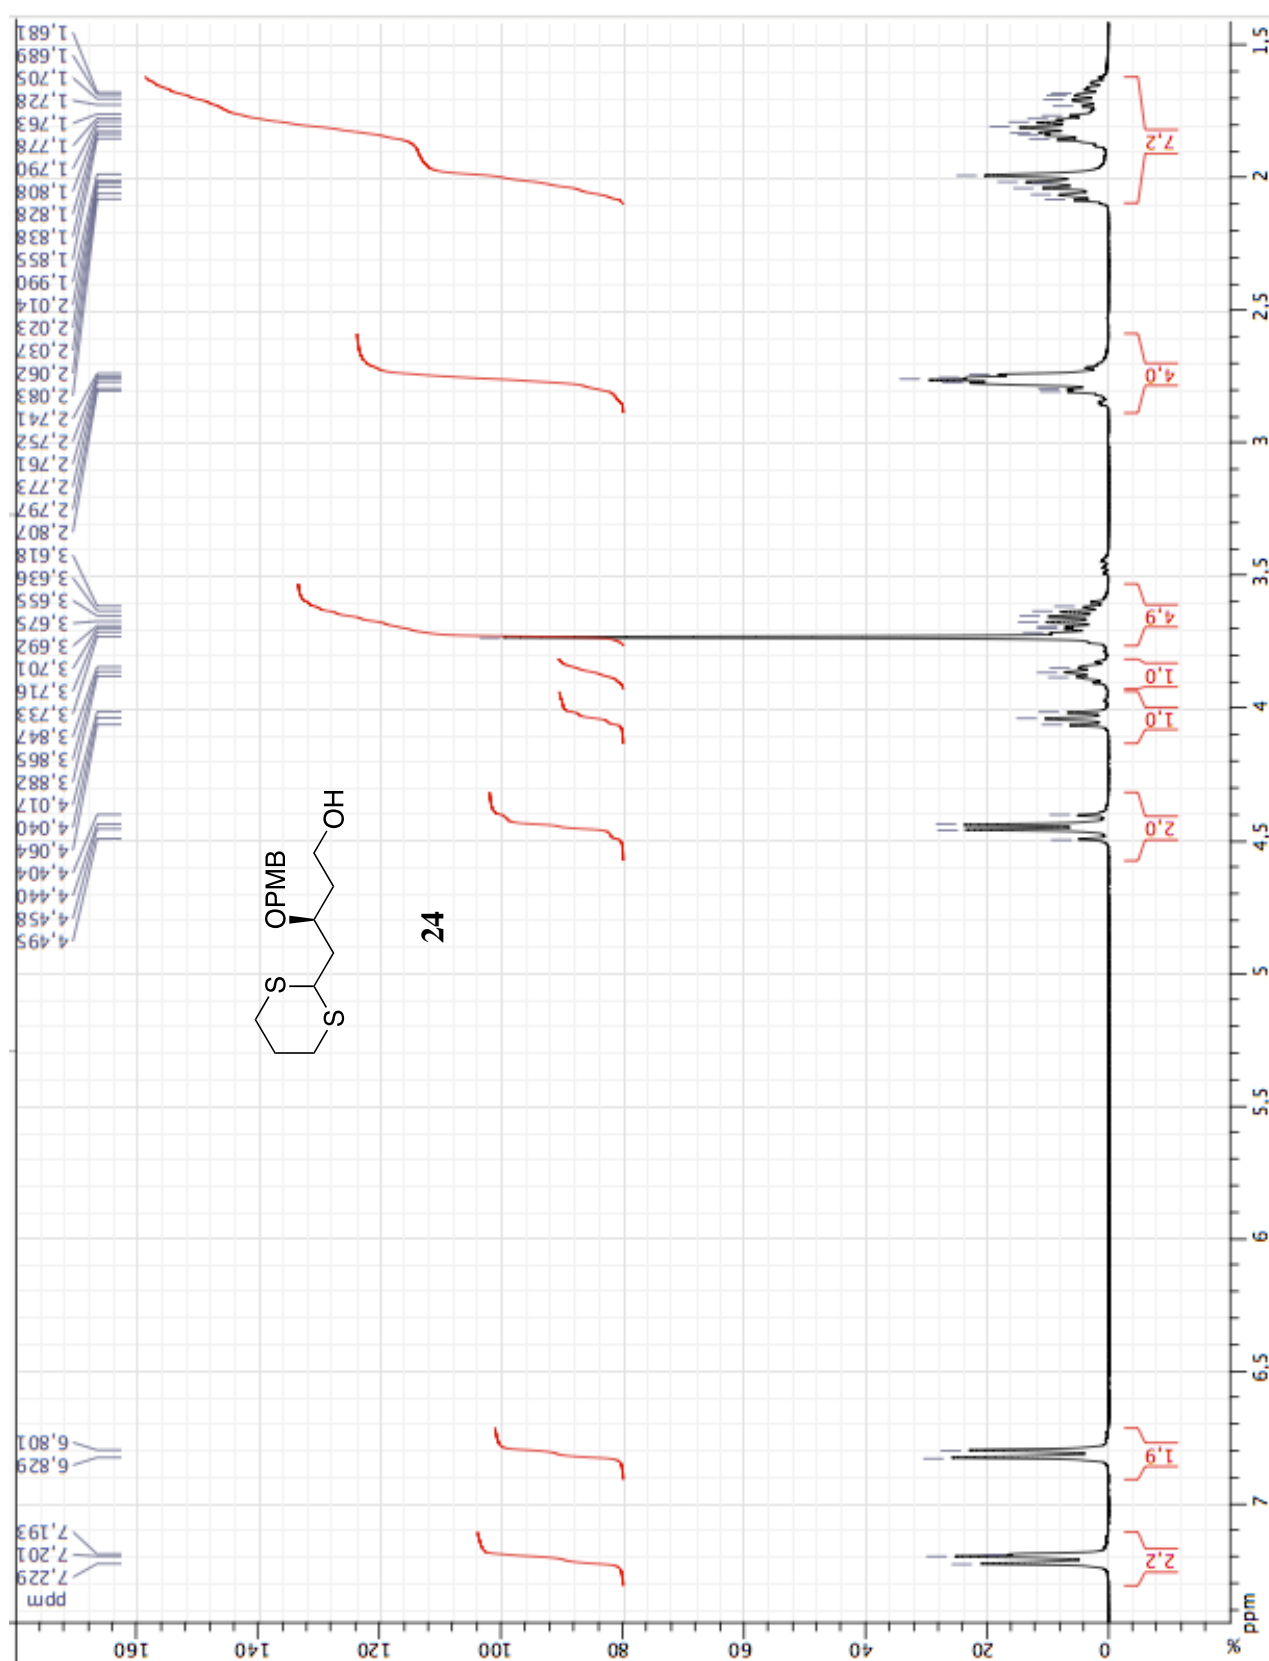

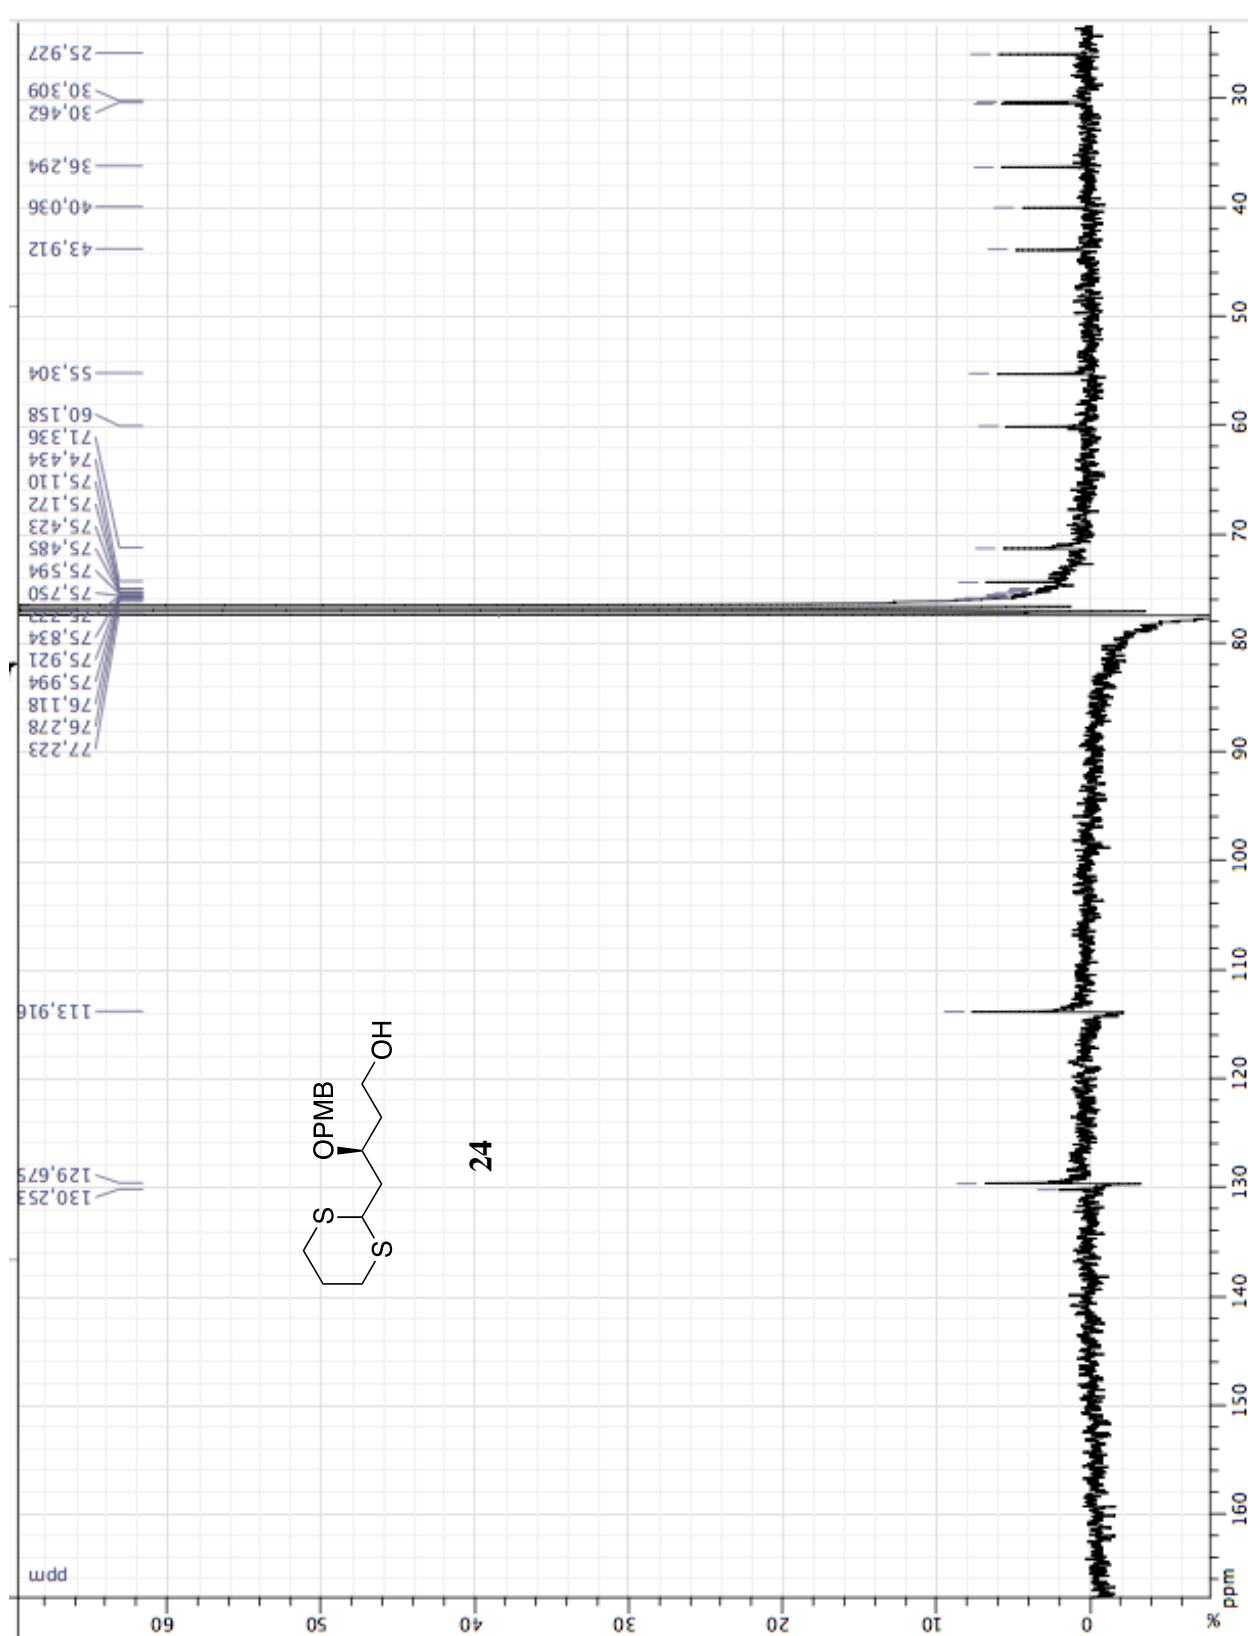

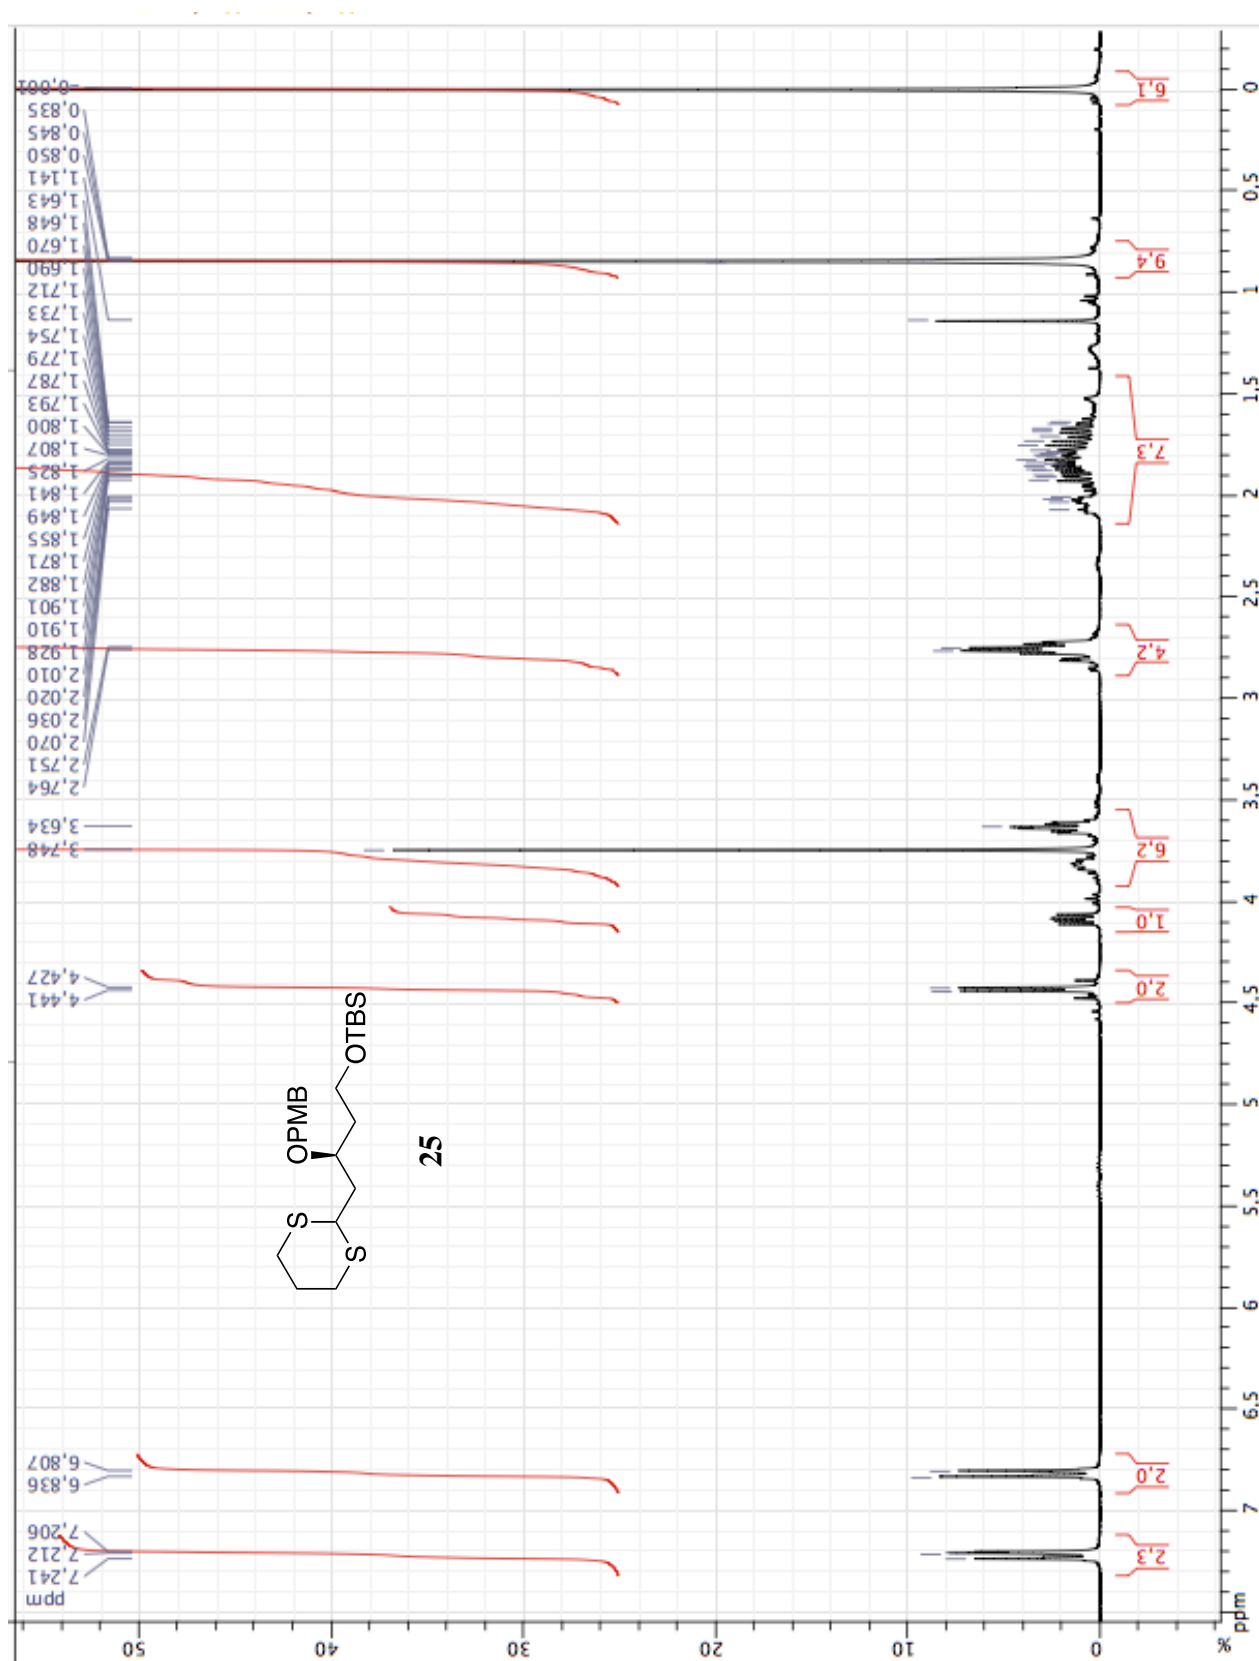

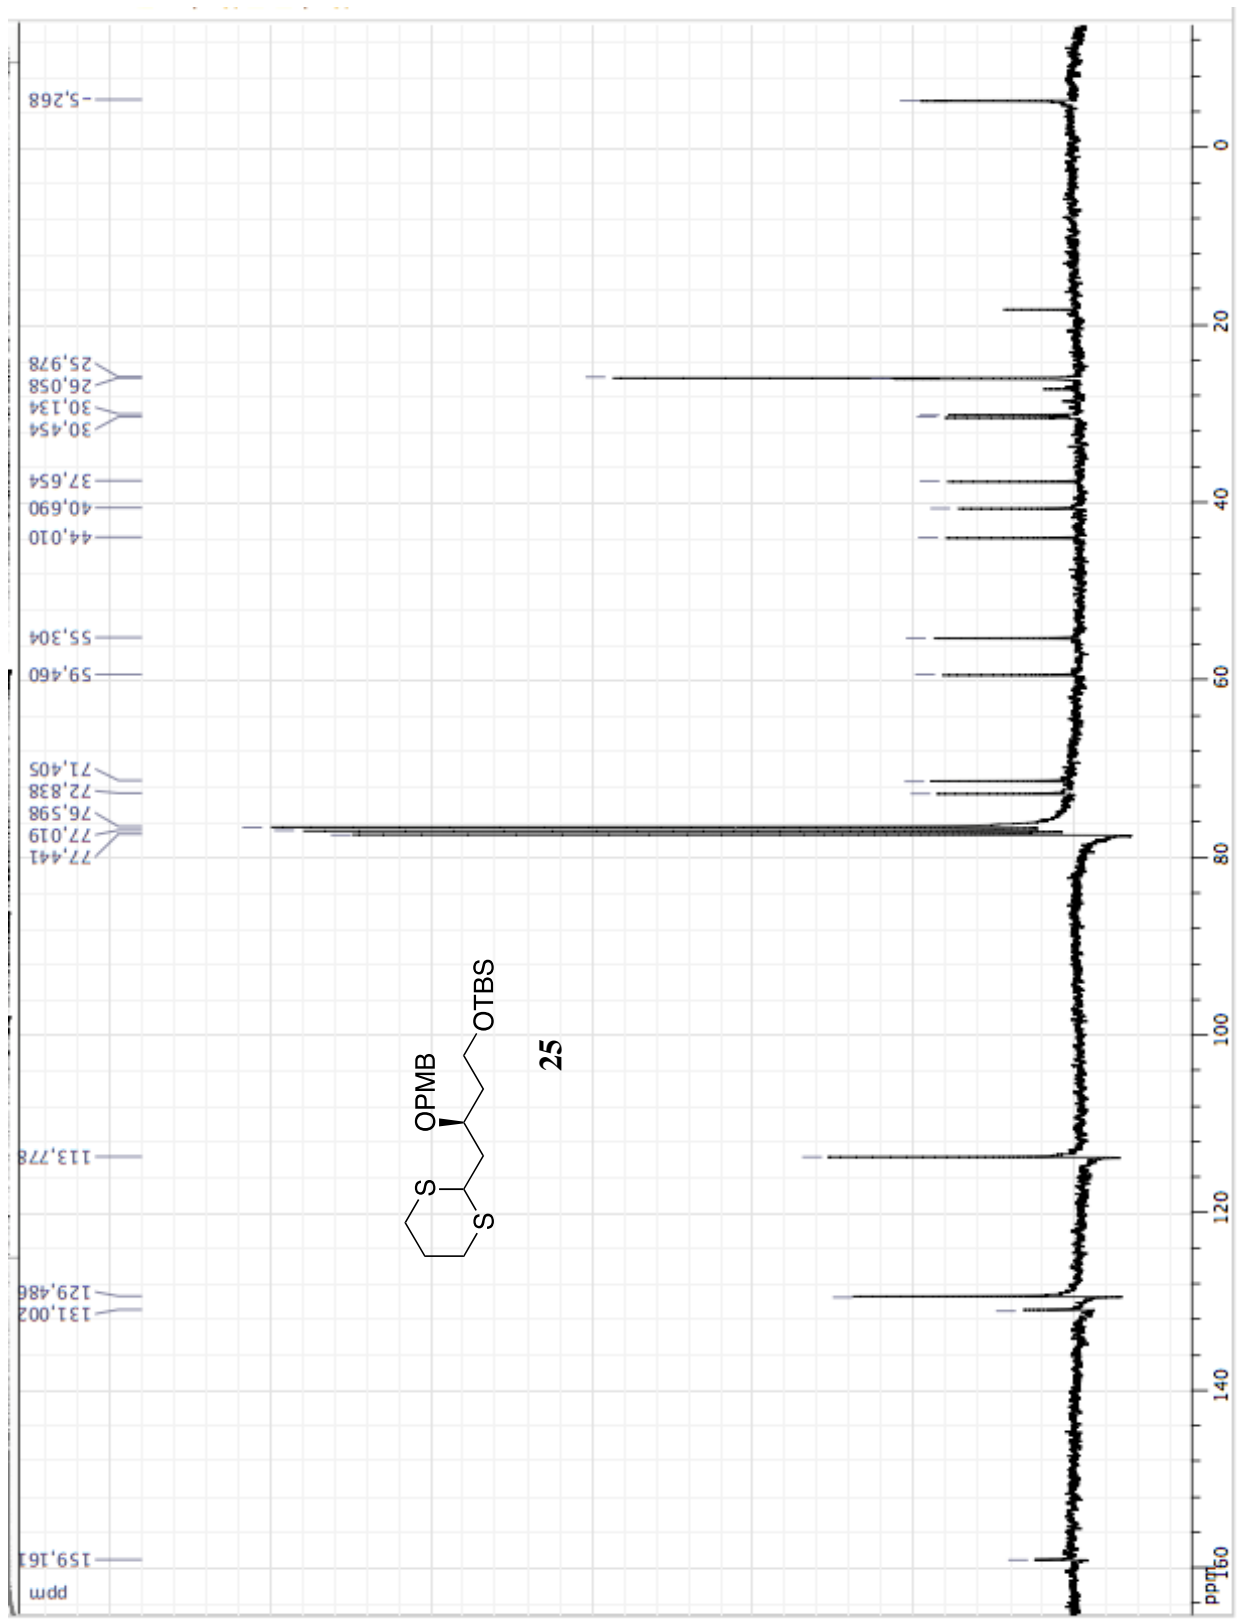

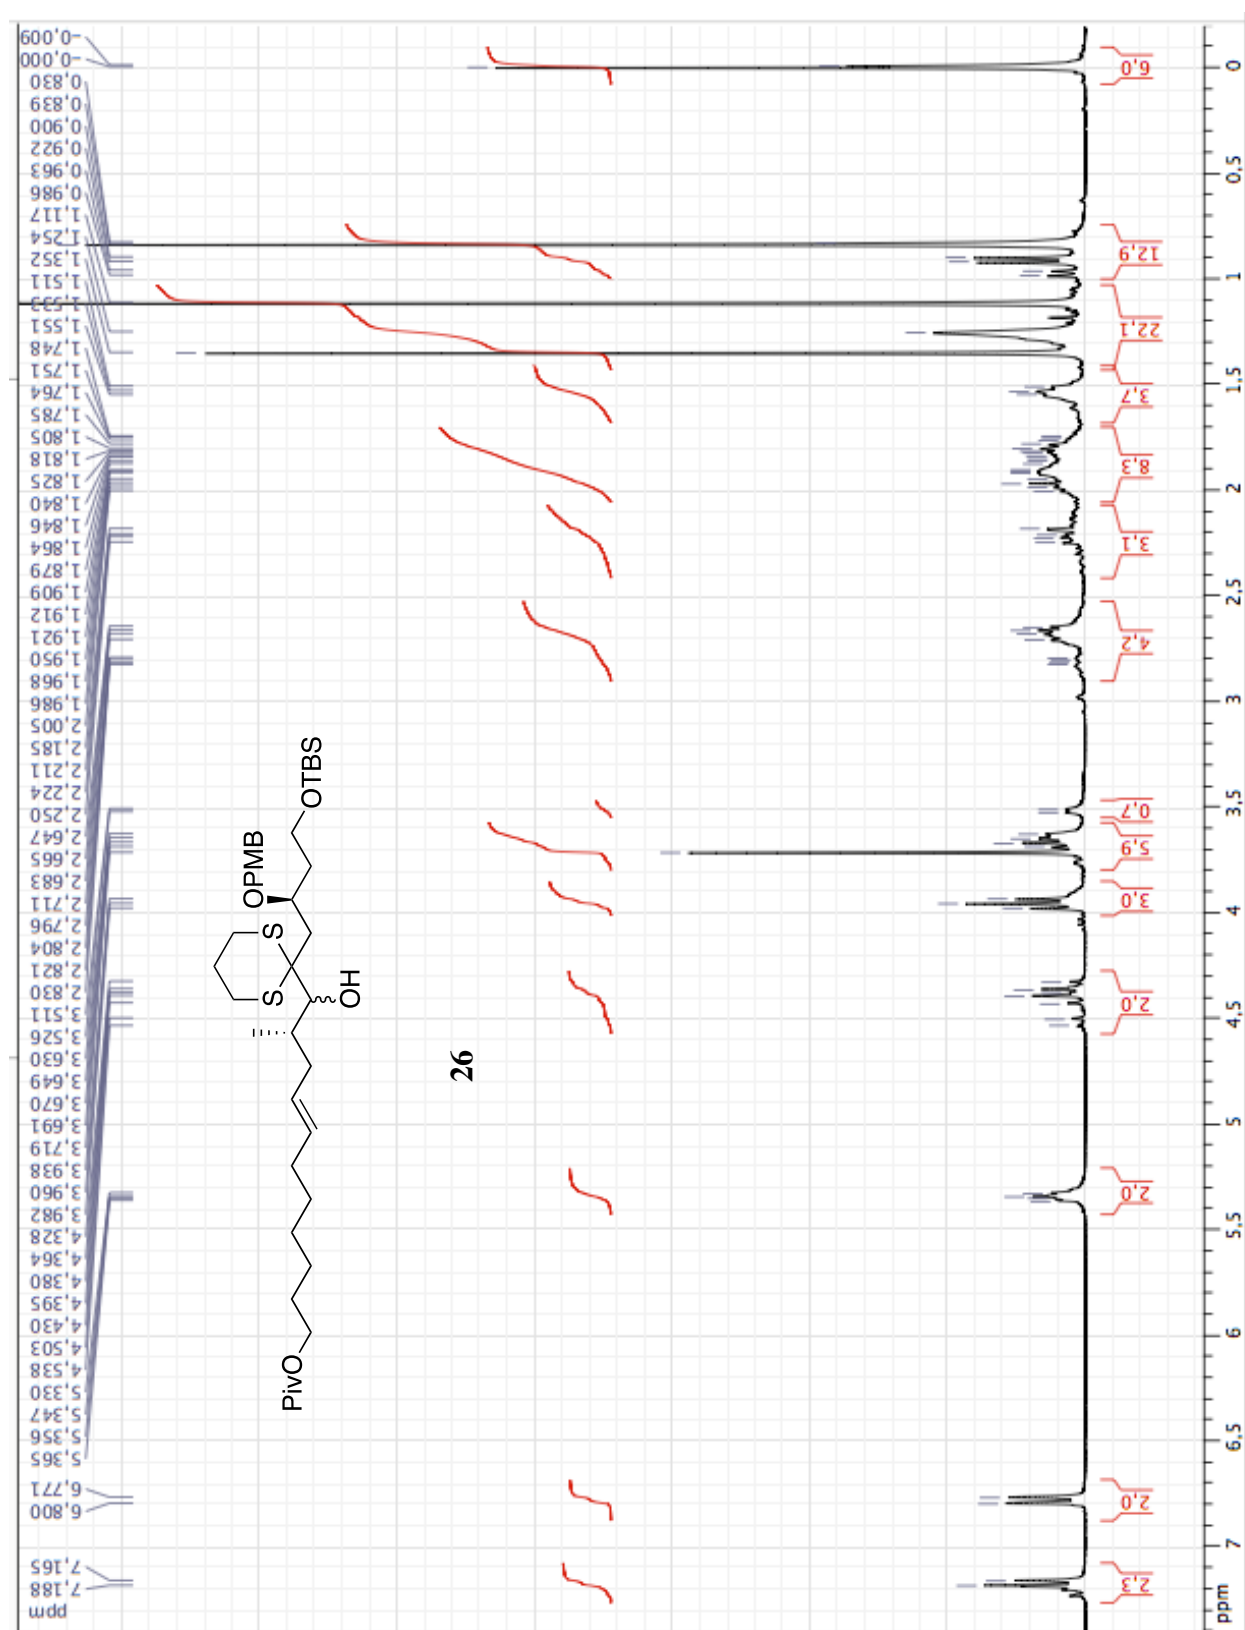

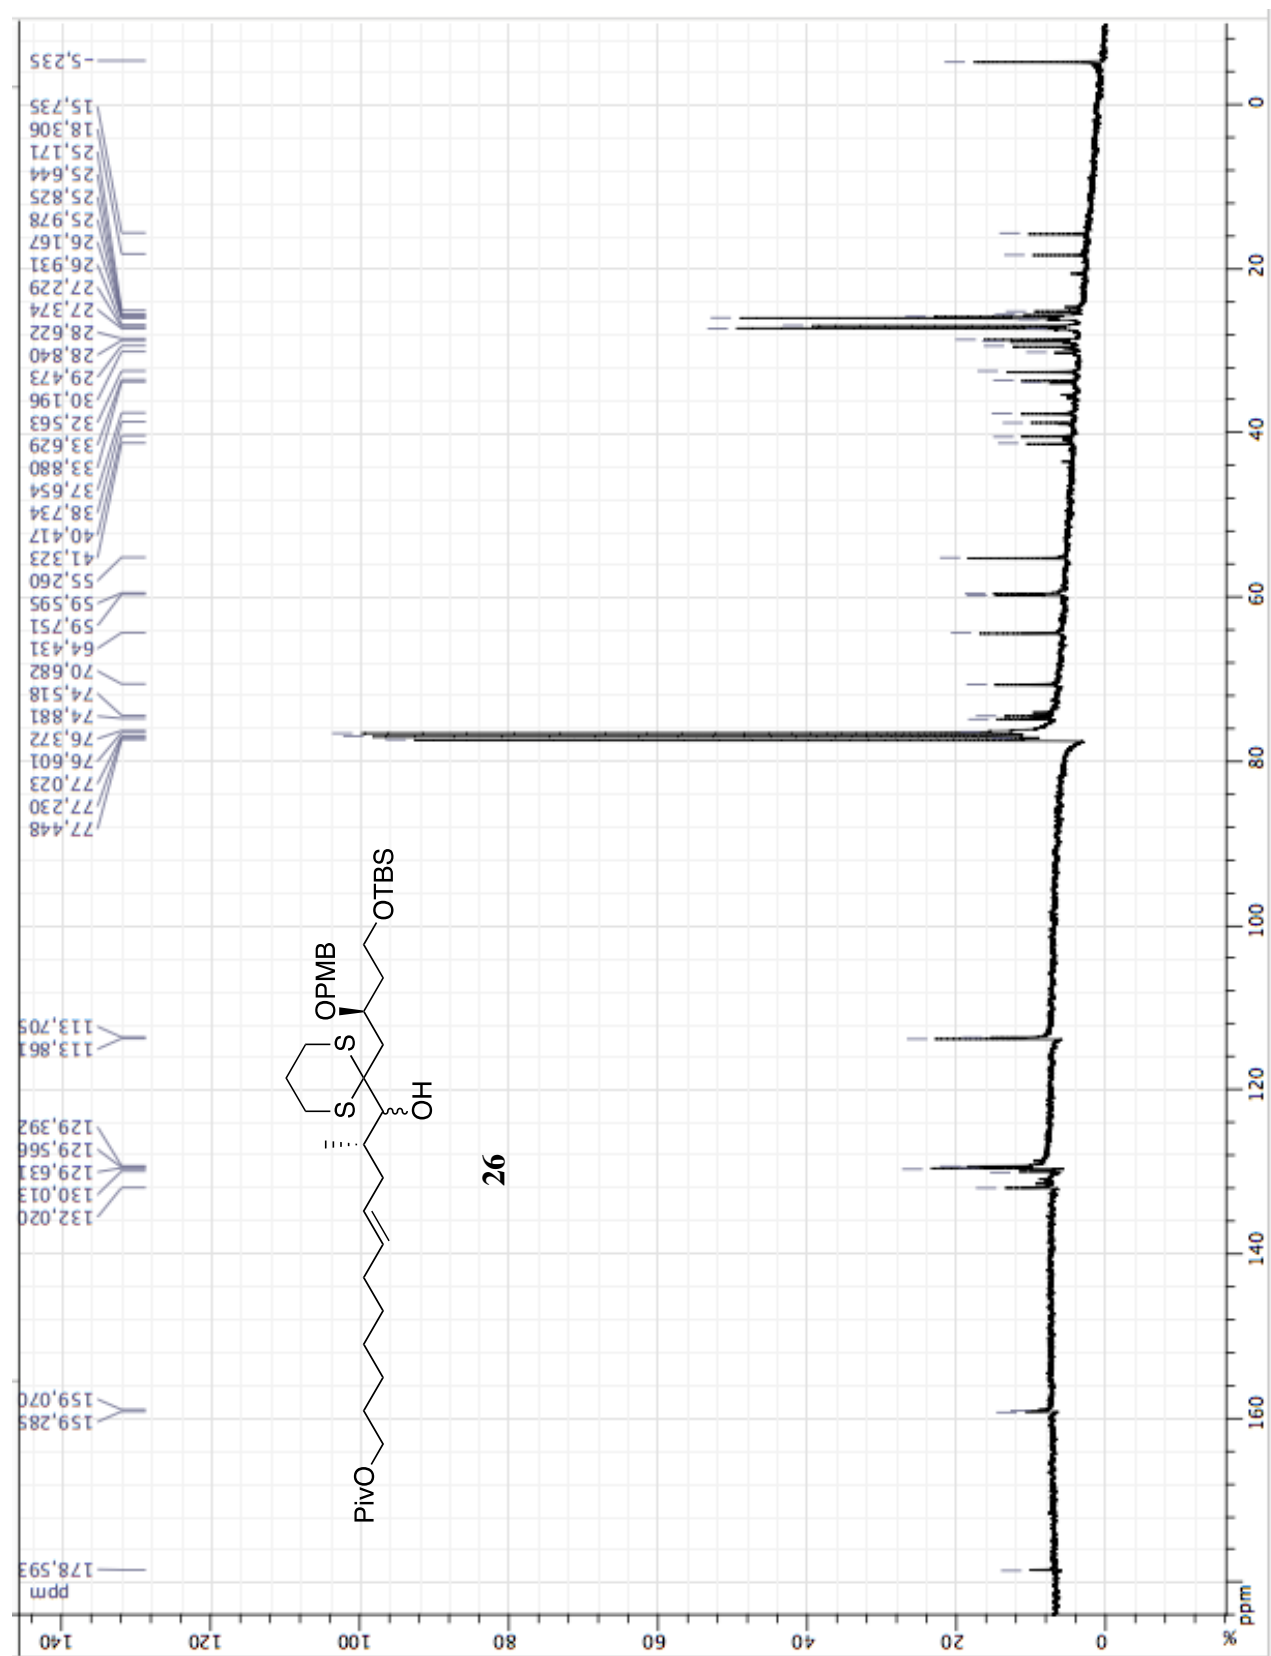

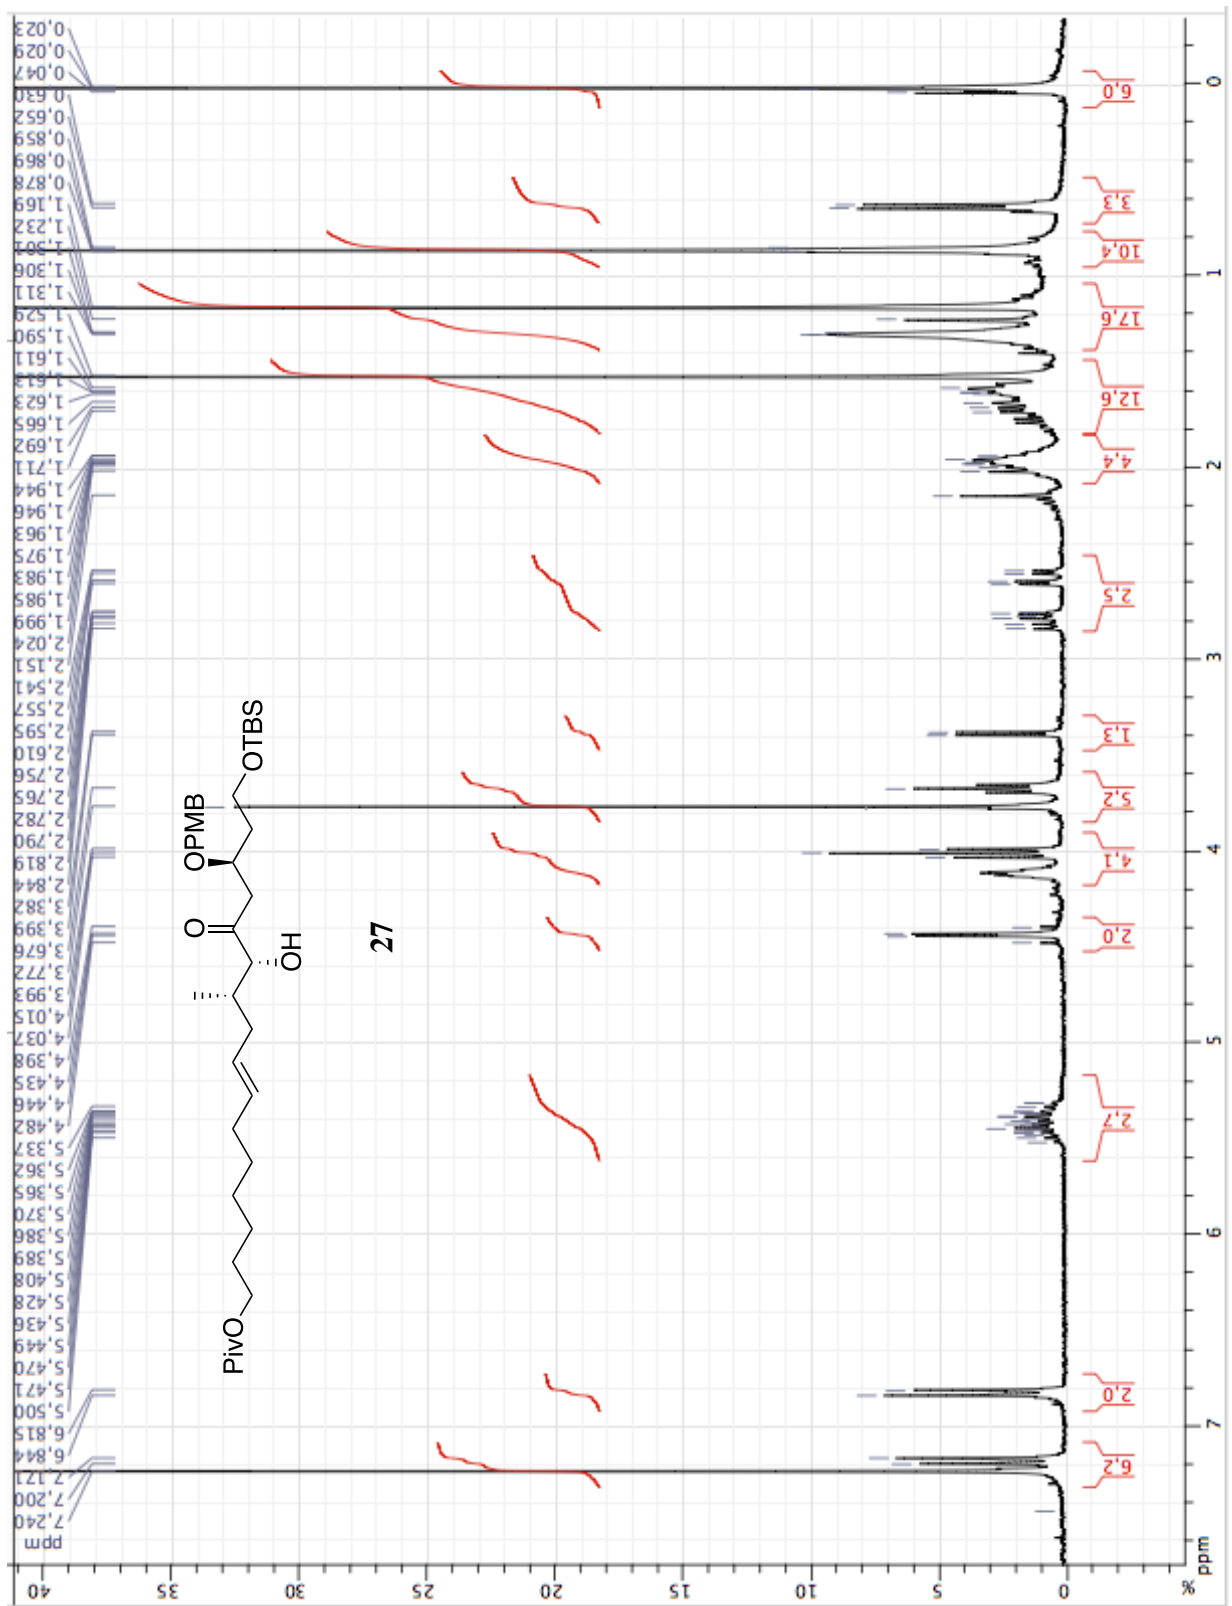

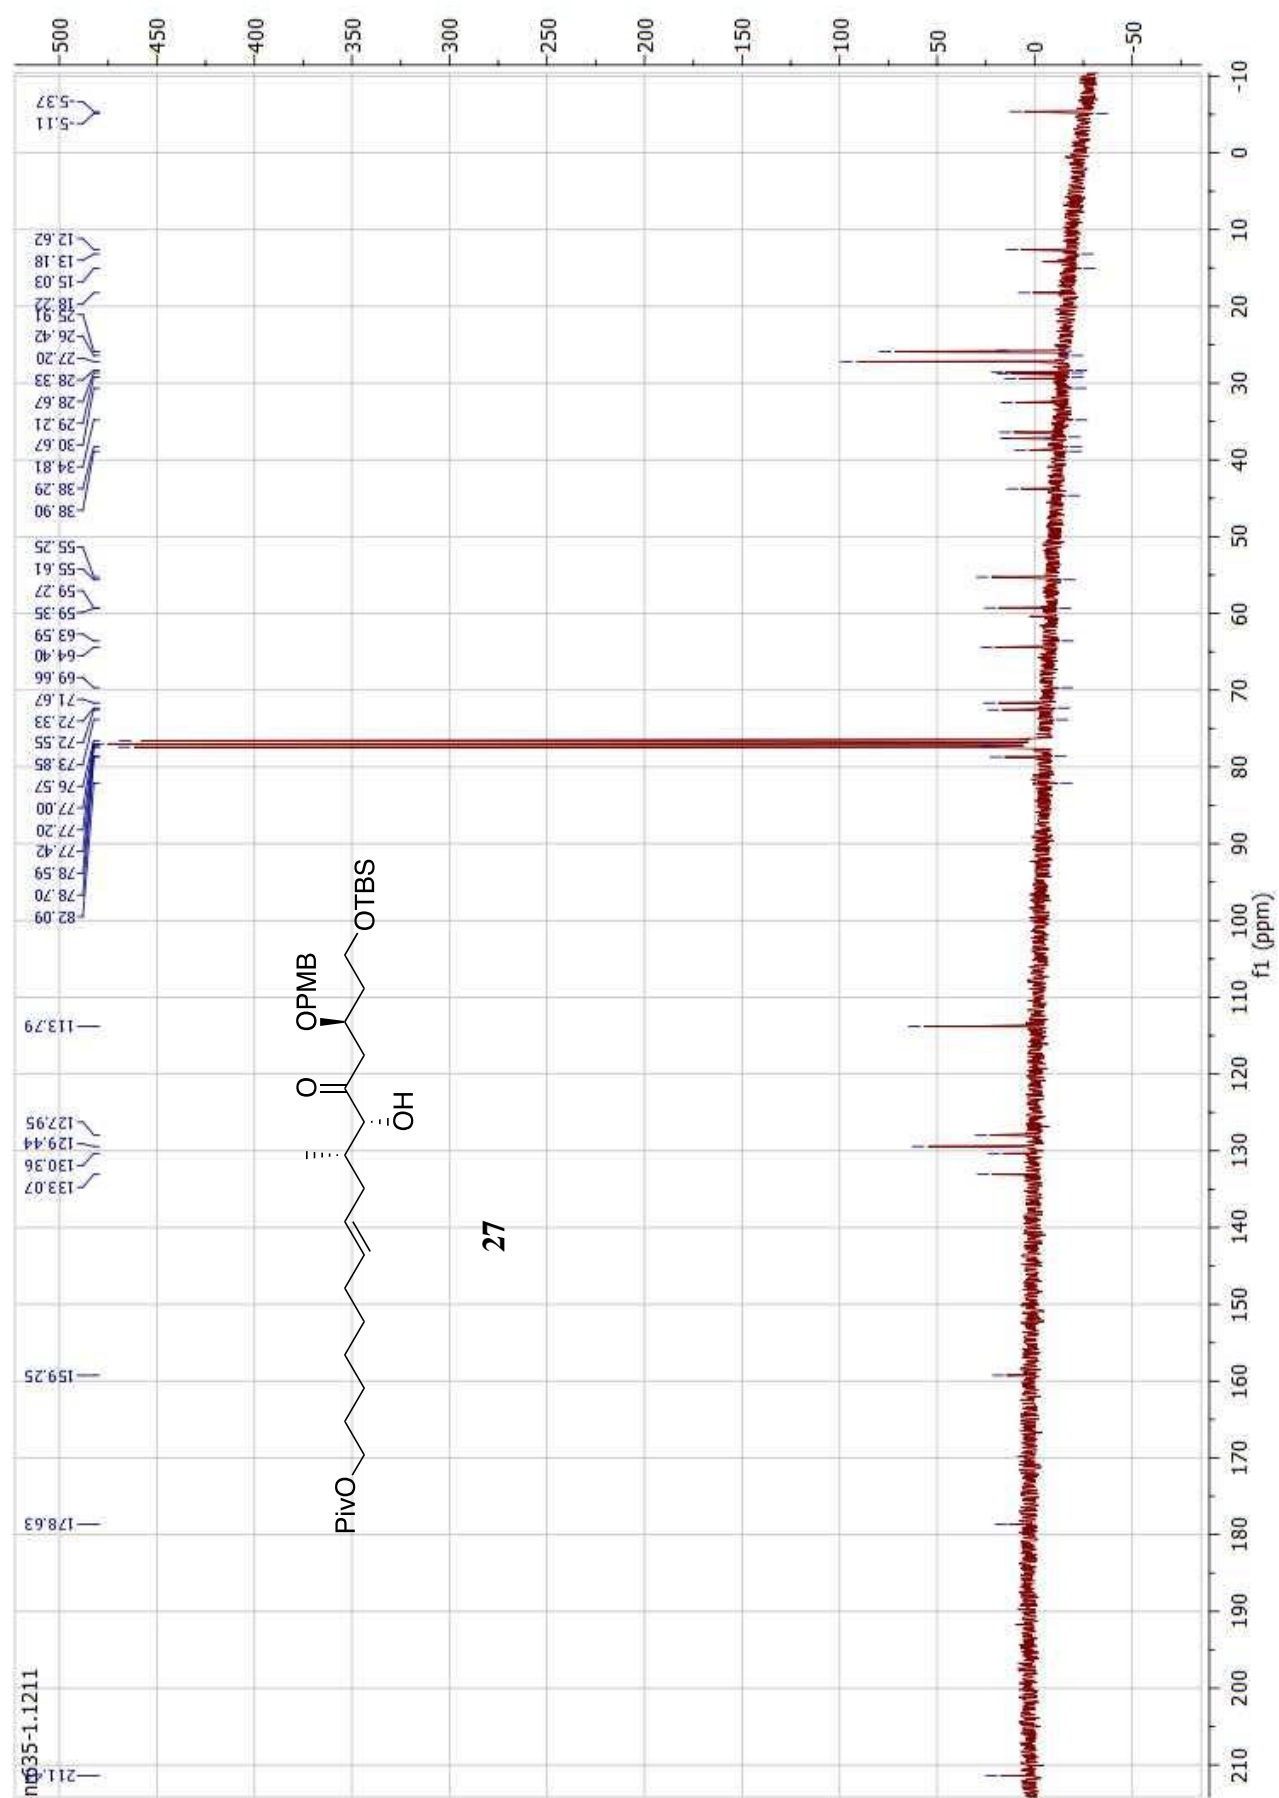

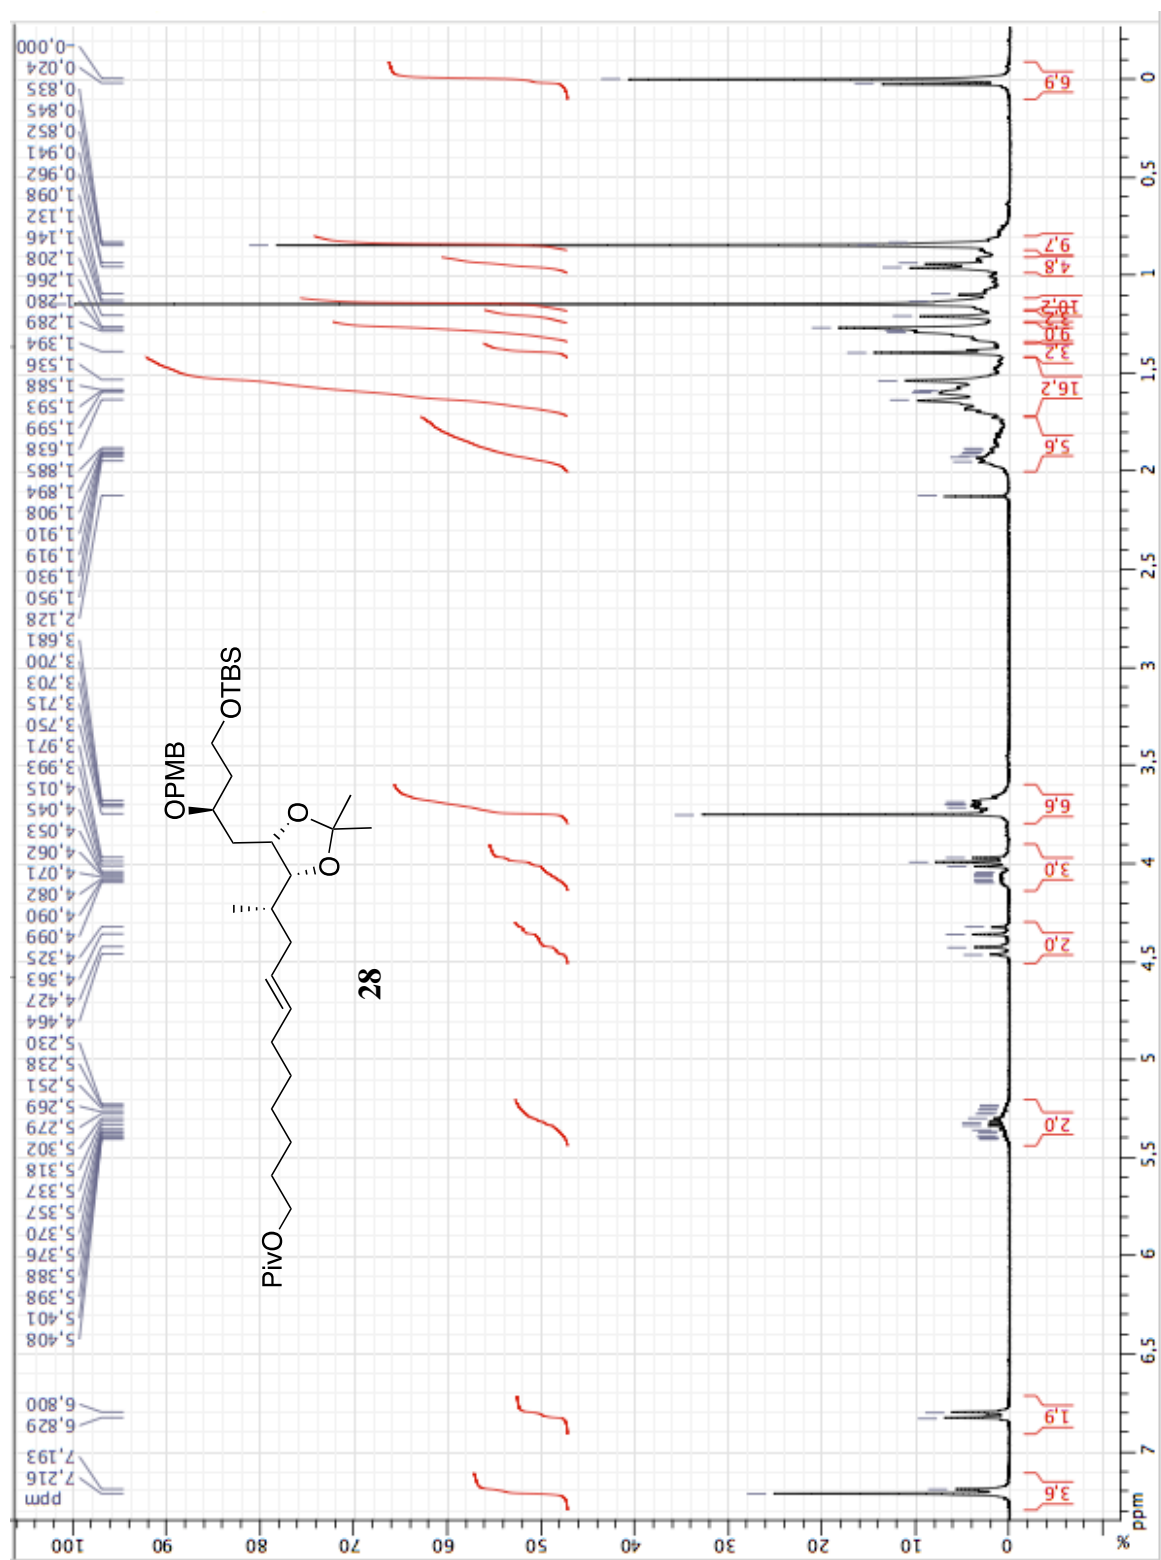

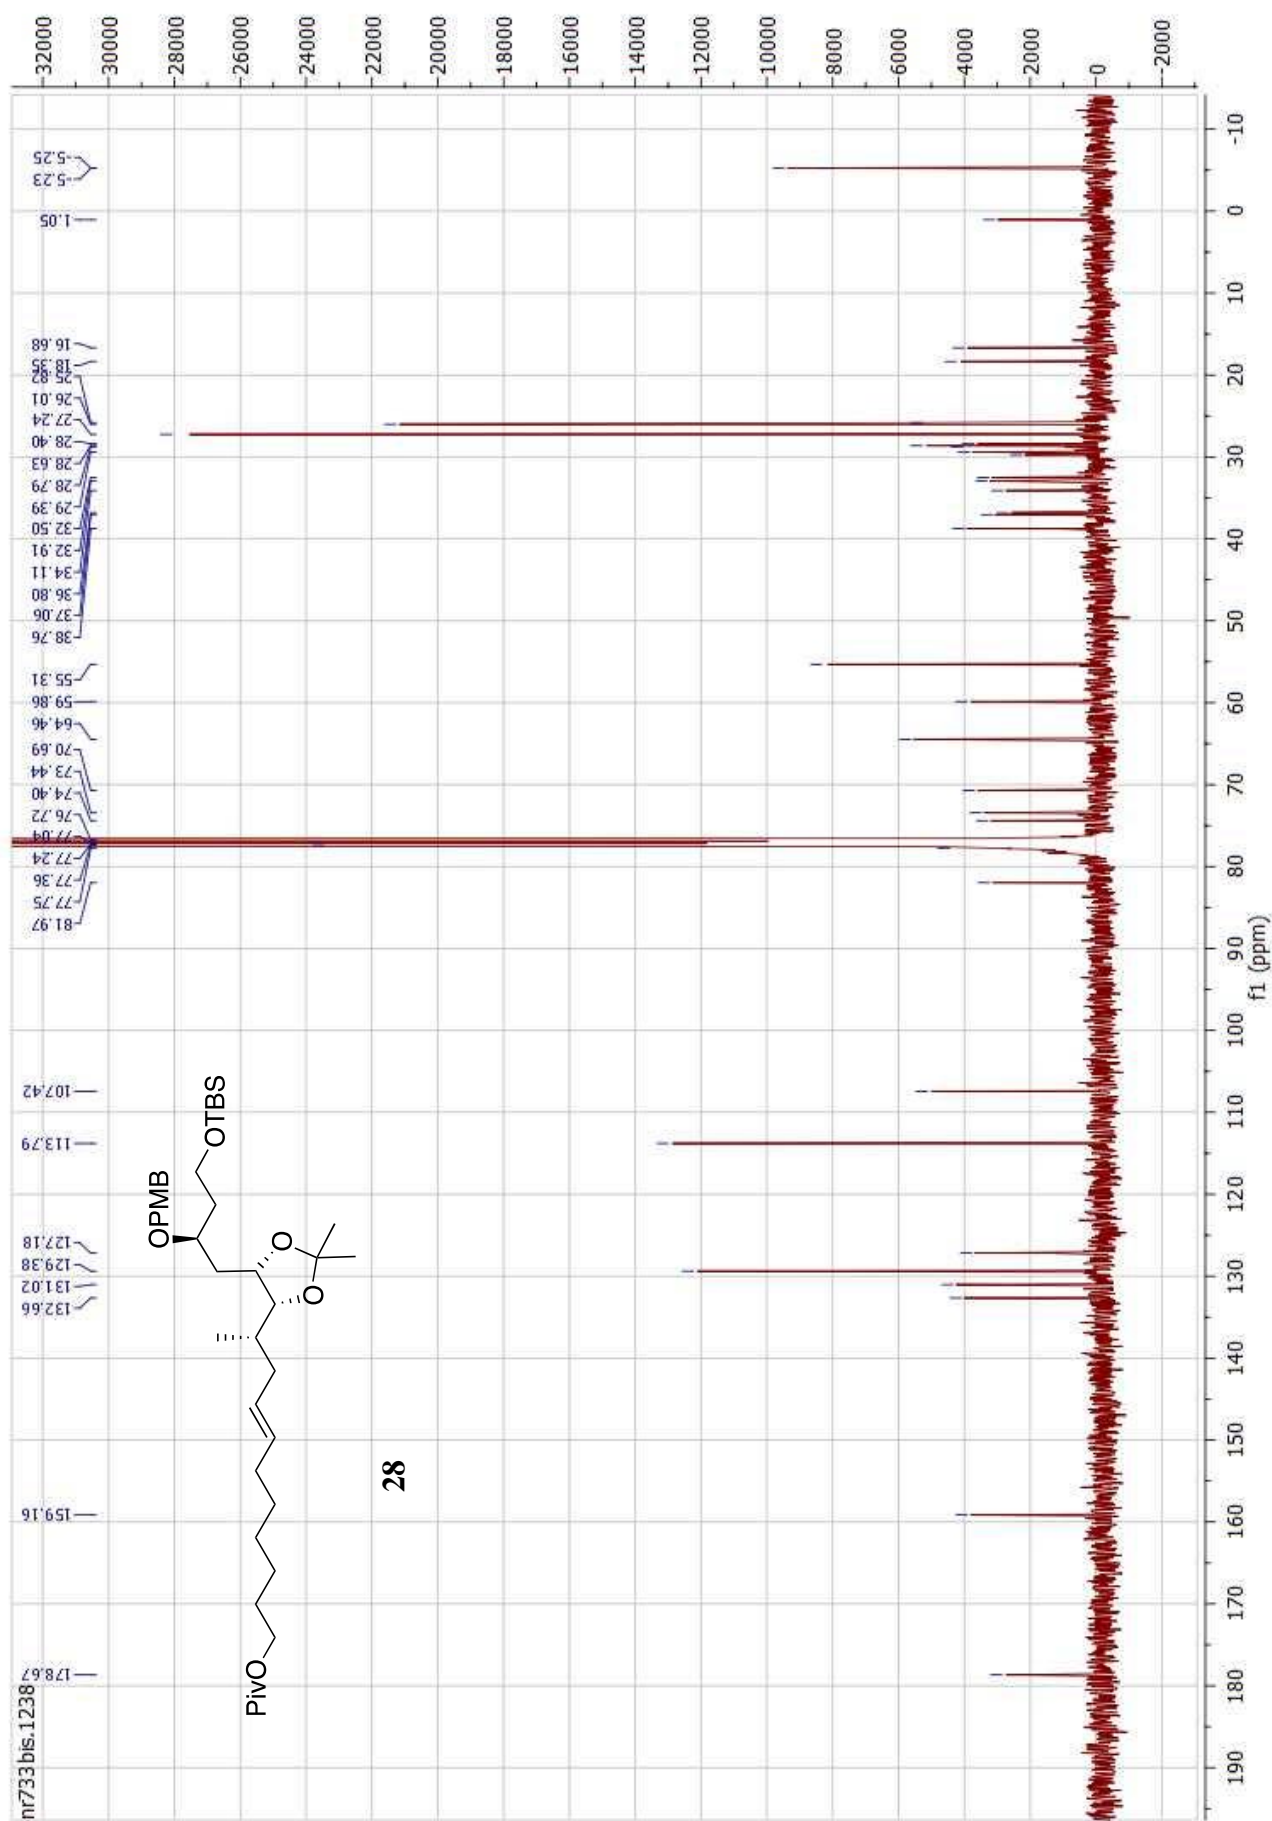

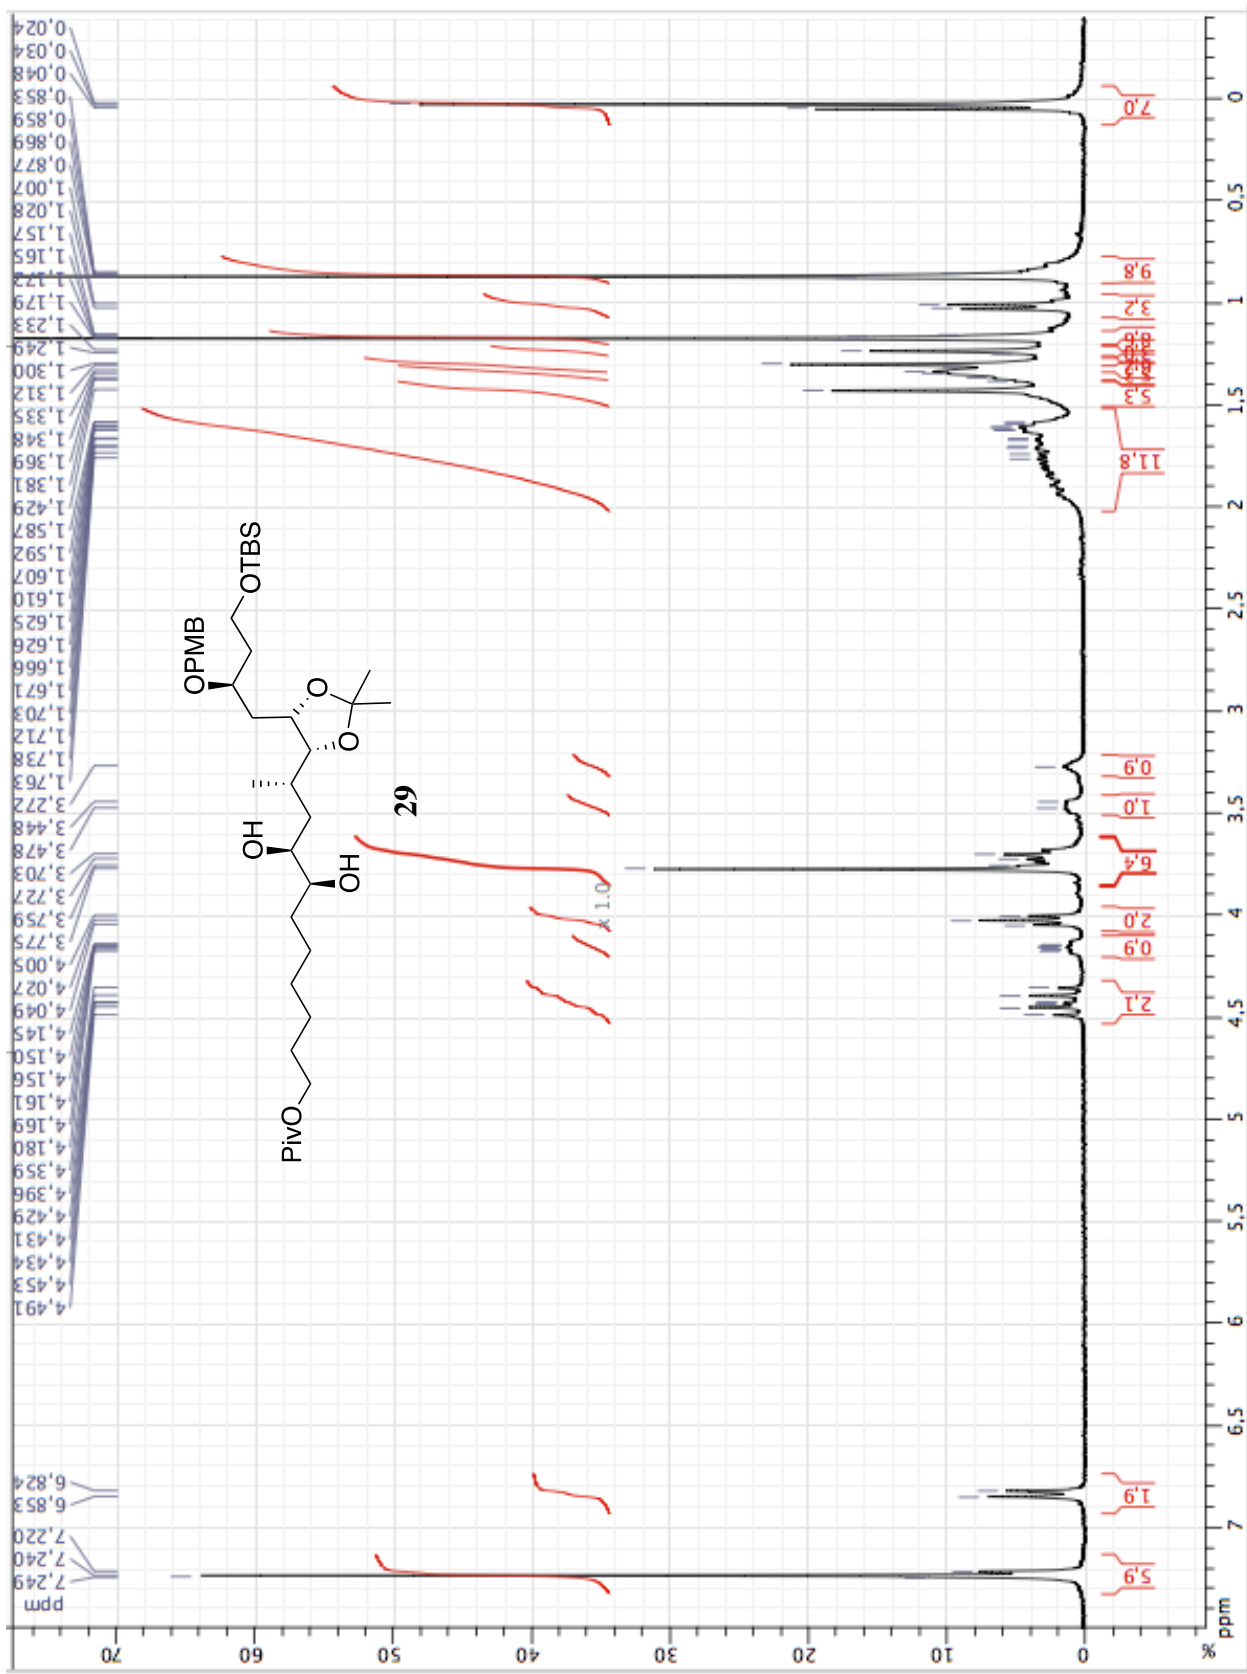

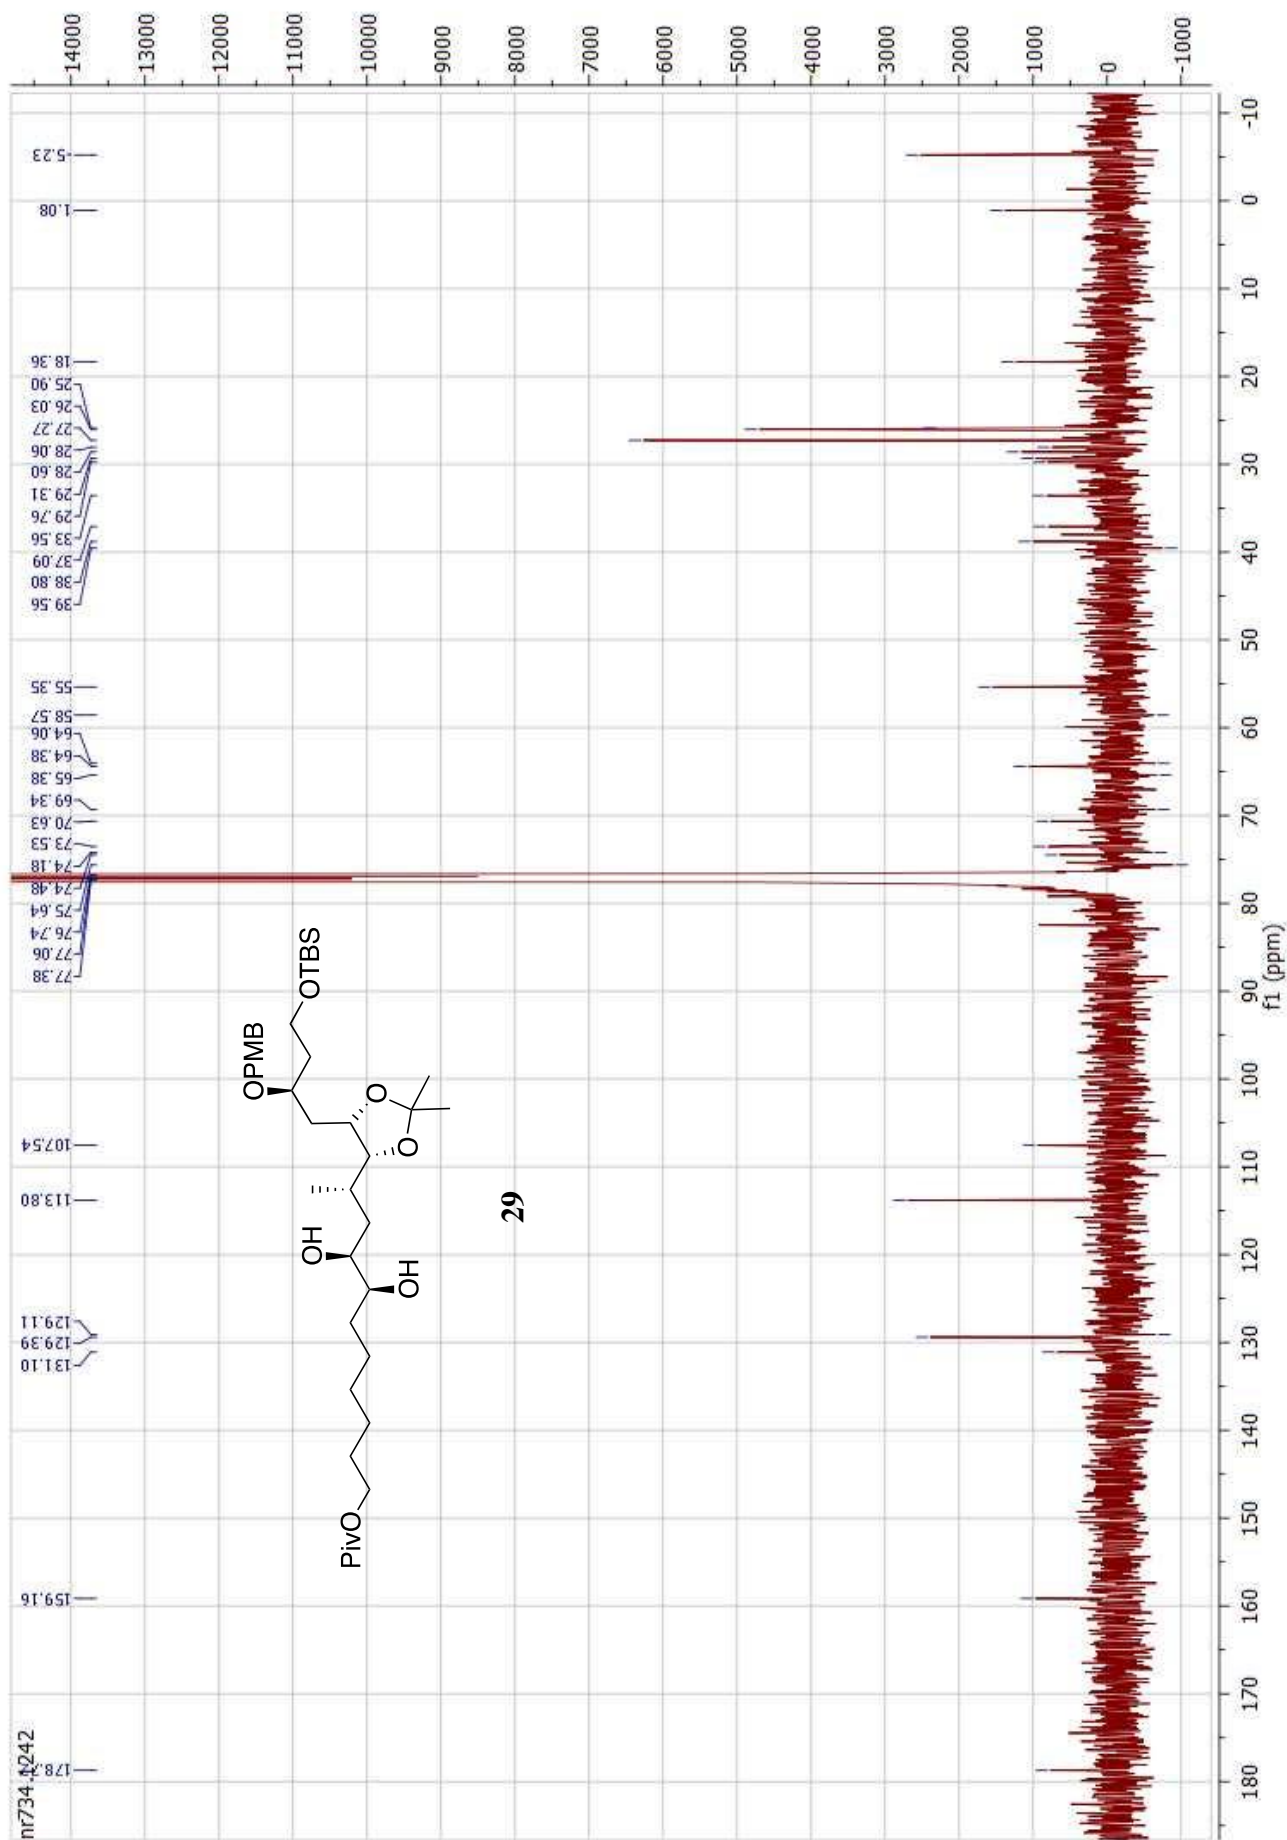

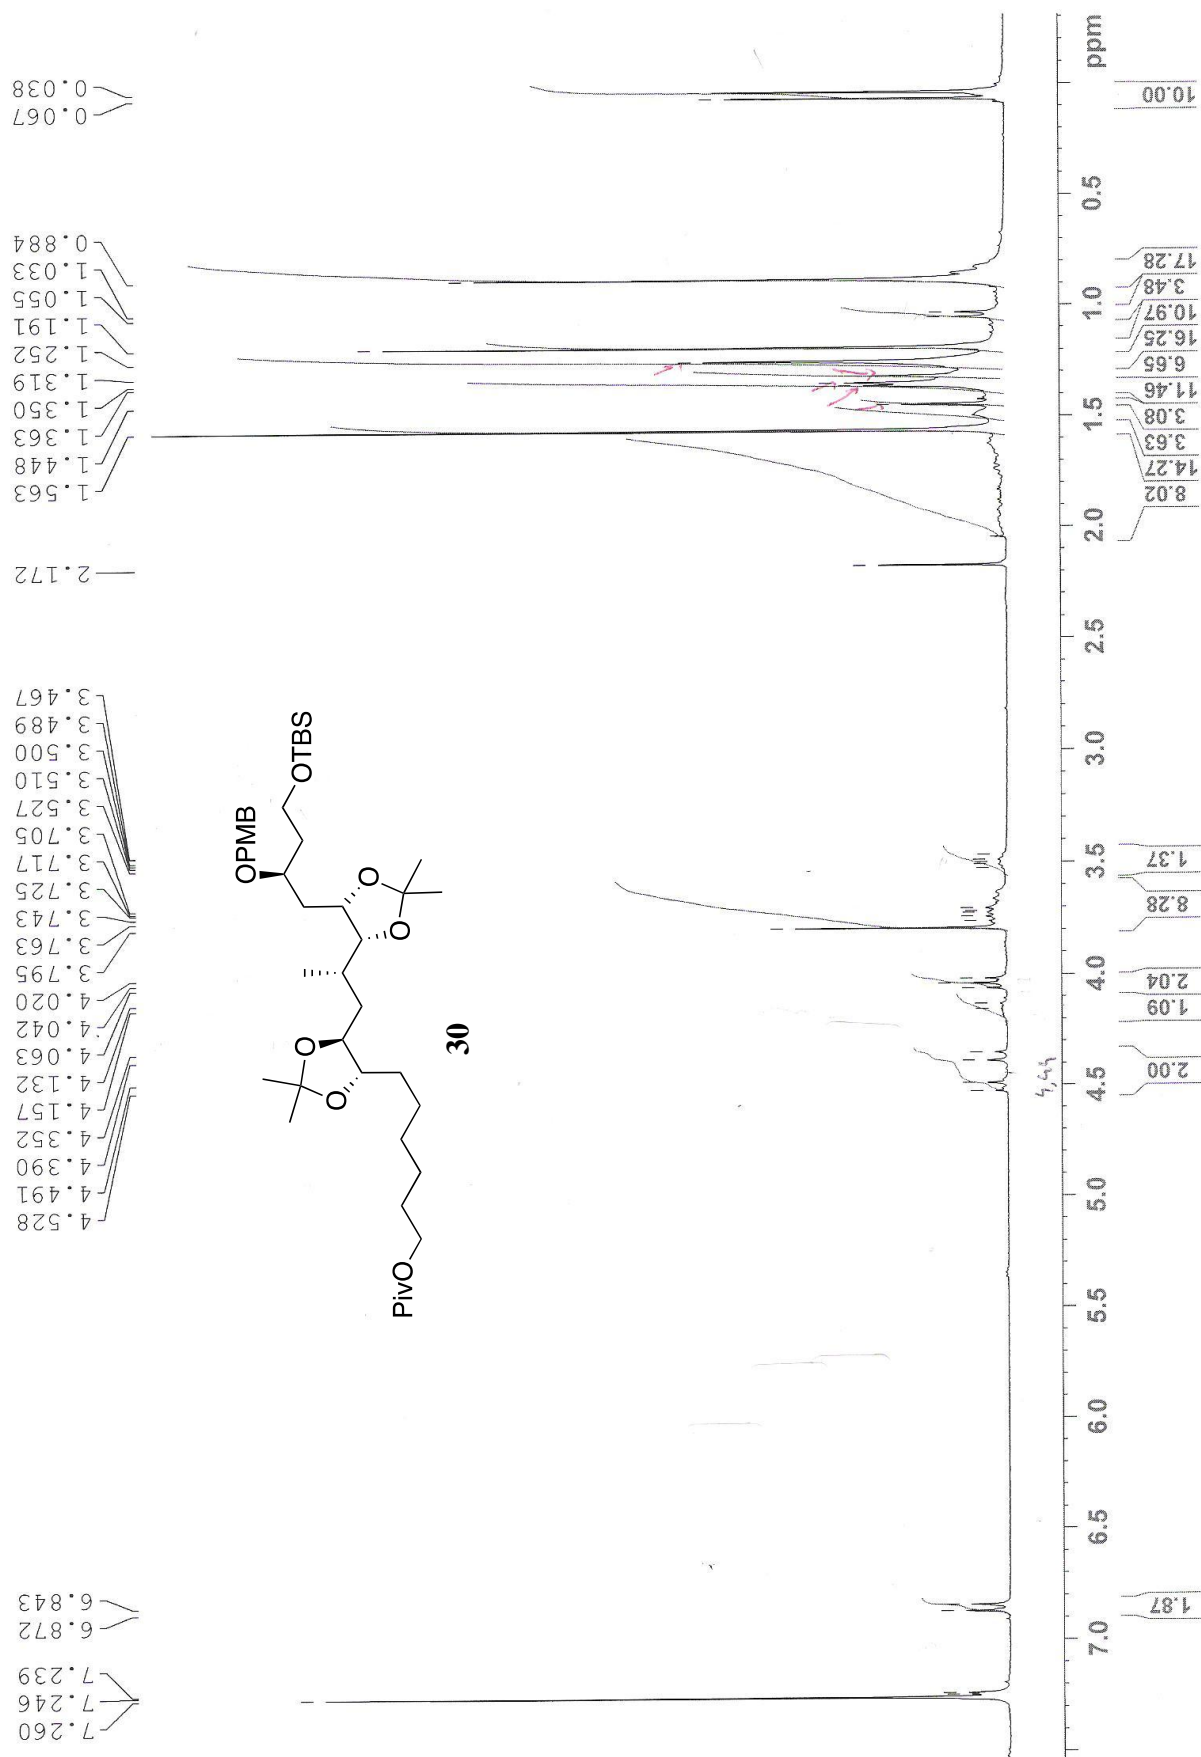

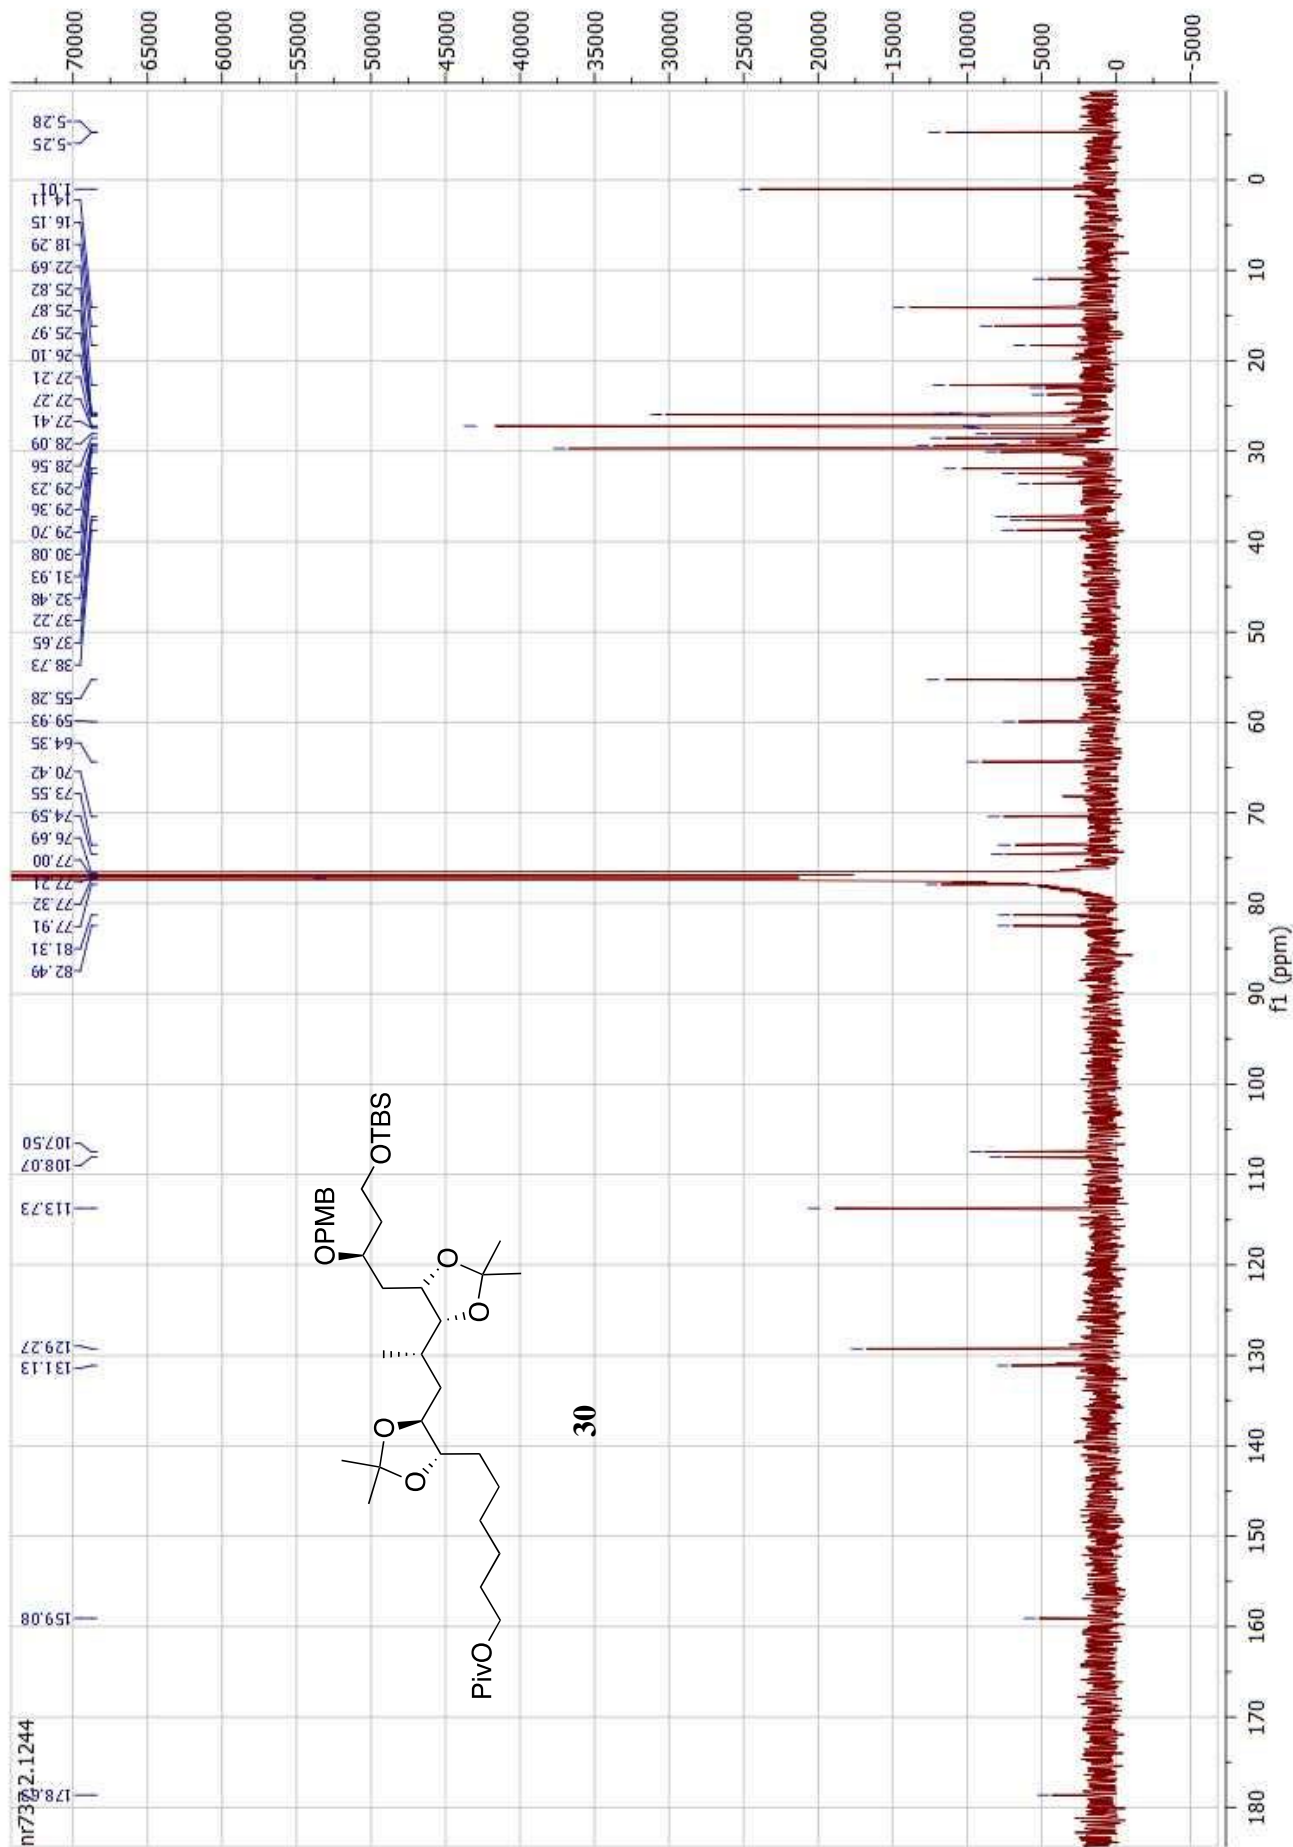

Supplement: c3ob41569d.pdf [file c3ob41569d.pdf]
